# Supplementary material
Source: PubMed Central journal article supplement (PMC4784809)
Supplement: welb028205.w1_default.pdf [file welb028205.w1_default.pdf]

## **Supplemental Online Content**

**eTable 1.** STROBE checklist for cohort studies

**eTable 2a.** Administrative data definitions used to define medical comorbidities

**eTable 2b.** Specific drugs included within each medication class

**eTable 2c.** Administrative data definitions used to define medical investigations and procedures.

**eTable 4.** Coding definition for primary and secondary outcomes

**eTable 5.** Complete baselines for unmatched and matched cohorts.

**eTable 6.** Study alpha antagonists and their doses and prescription details.

**eTable 7.** Primary outcomes among exposed and unexposed patients in the 180 days prior to alpha antagonist initiation or index date.

**eFigure 1.** Flow diagram of cohort selection

**Supplemental References**

**eTable 1.** STROBE checklist for cohort studies

|                           | Item No. | Recommendation                                                                                                                                                                                               | Page No.                                                           |
|---------------------------|----------|--------------------------------------------------------------------------------------------------------------------------------------------------------------------------------------------------------------|--------------------------------------------------------------------|
| <b>Title and abstract</b> | 1        | (a) Indicate the study's design with a commonly used term in the title or the abstract                                                                                                                       | Abstract, <i>Design</i>                                            |
|                           |          | (b) Provide in the abstract an informative and balanced summary of what was done and what was found                                                                                                          | Abstract                                                           |
| <b>Introduction</b>       |          |                                                                                                                                                                                                              |                                                                    |
| Background/rationale      | 2        | Explain the scientific background and rationale for the investigation being reported                                                                                                                         | Introduction                                                       |
| Objectives                | 3        | State specific objectives, including any prespecified hypotheses                                                                                                                                             | Abstract & Introduction                                            |
| <b>Methods</b>            |          |                                                                                                                                                                                                              |                                                                    |
| Study design              | 4        | Present key elements of study design early in the paper                                                                                                                                                      | Methods, <i>Design &amp; Setting</i>                               |
| Setting                   | 5        | Describe the setting, locations, and relevant dates, including periods of recruitment, exposure, follow-up, and data collection                                                                              | Methods, <i>Design &amp; Setting</i> and <i>Patient Population</i> |
| Participants              | 6        | (a) <i>Cohort study</i> —Give the eligibility criteria, and the sources and methods of selection of participants. Describe methods of follow-up                                                              | Methods, <i>Patient Population</i> , <i>eFigure 1</i>              |
| Variables                 | 7        | Clearly define all outcomes, exposures, predictors, potential confounders, and effect modifiers. Give diagnostic criteria, if applicable                                                                     | Methods, <i>Study outcomes</i> , <i>Table 2</i> , <i>eTable 4</i>  |
| Data sources/measurement  | 8*       | For each variable of interest, give sources of data and details of methods of assessment (measurement). Describe comparability of assessment methods if there is more than one group                         | <i>eTable 2a-c</i>                                                 |
| Bias                      | 9        | Describe any efforts to address potential sources of bias                                                                                                                                                    | Methods, <i>Statistical analysis</i>                               |
| Study size                | 10       | Explain how the study size was arrived at                                                                                                                                                                    | Methods, <i>eFigure 1</i> , population based study                 |
| Quantitative variables    | 11       | Explain how quantitative variables were handled in the analyses. If applicable, describe which groupings were chosen and why                                                                                 | Methods<br><i>eTable 5</i>                                         |
| Statistical methods       | 12       | (a) Describe all statistical methods, including those used to control for confounding                                                                                                                        | Methods, <i>Statistical analysis</i>                               |
|                           |          | (b) Describe any methods used to examine subgroups and interactions                                                                                                                                          | Methods, <i>Statistical analysis</i>                               |
|                           |          | (c) Explain how missing data were addressed                                                                                                                                                                  | Methods, <i>Data sources</i>                                       |
|                           |          | (d) <i>Cohort study</i> —If applicable, explain how loss to follow-up was addressed                                                                                                                          | Methods, <i>Patient Population</i>                                 |
|                           |          | (e) Describe any sensitivity analyses                                                                                                                                                                        | Methods, <i>Statistical analysis</i>                               |
| Participants              | 13*      | (a) Report numbers of individuals at each stage of study—eg numbers potentially eligible, examined for eligibility, confirmed eligible, included in the study, completing follow-up, and analysed            | <i>eFigure 1</i>                                                   |
|                           |          | (b) Give reasons for non-participation at each stage                                                                                                                                                         | NA                                                                 |
|                           |          | (c) Consider use of a flow diagram                                                                                                                                                                           | <i>eFigure 1</i>                                                   |
| Descriptive data          | 14*      | (a) Give characteristics of study participants (eg demographic, clinical, social) and information on exposures and potential confounders                                                                     | <i>eTable 5</i>                                                    |
|                           |          | (b) Indicate number of participants with missing data for each variable of interest                                                                                                                          | Methods, <i>Data sources</i>                                       |
|                           |          | (c) <i>Cohort study</i> —Summarise follow-up time (eg, average and total amount)                                                                                                                             | NA.                                                                |
| Outcome data              | 15*      | <i>Cohort study</i> —Report numbers of outcome events or summary measures over time                                                                                                                          | Table 1                                                            |
| Main results              | 16       | (a) Give unadjusted estimates and, if applicable, confounder-adjusted estimates and their precision (eg, 95% confidence interval). Make clear which confounders were adjusted for and why they were included | Table 1, Table 2                                                   |

|                          |    |                                                                                                                                                                            |                                |
|--------------------------|----|----------------------------------------------------------------------------------------------------------------------------------------------------------------------------|--------------------------------|
|                          |    | (b) Report category boundaries when continuous variables were categorized                                                                                                  | Results<br>Interquartile range |
|                          |    | (c) If relevant, consider translating estimates of relative risk into absolute risk for a meaningful time period                                                           | Results<br>Table 1, Table 2    |
| Other analyses           | 17 | Report other analyses done—eg analyses of subgroups and interactions, and sensitivity analyses                                                                             | Table 2, eTable 7              |
| <b>Discussion</b>        |    |                                                                                                                                                                            |                                |
| Key results              | 18 | Summarise key results with reference to study objectives                                                                                                                   | Discussion                     |
| Limitations              | 19 | Discuss limitations of the study, taking into account sources of potential bias or imprecision. Discuss both direction and magnitude of any potential bias                 | Discussion                     |
| Interpretation           | 20 | Give a cautious overall interpretation of results considering objectives, limitations, multiplicity of analyses, results from similar studies, and other relevant evidence | Discussion                     |
| Generalisability         | 21 | Discuss the generalisability (external validity) of the study results                                                                                                      | Discussion                     |
| <b>Other information</b> |    |                                                                                                                                                                            |                                |
| Funding                  | 22 | Give the source of funding and the role of the funders for the present study and, if applicable, for the original study on which the present article is based              | Acknowledgements               |

**eTable 2a.** Administrative data definitions used to define medical comorbidities.

| <b>Variable</b>                          | <b>Database</b>  | <b>Codes</b>                                                                                                                                                                                                                                                                                                                                                                                                                                                                                                                                                                                                                                                                                                                                                                                                                                                                                              |
|------------------------------------------|------------------|-----------------------------------------------------------------------------------------------------------------------------------------------------------------------------------------------------------------------------------------------------------------------------------------------------------------------------------------------------------------------------------------------------------------------------------------------------------------------------------------------------------------------------------------------------------------------------------------------------------------------------------------------------------------------------------------------------------------------------------------------------------------------------------------------------------------------------------------------------------------------------------------------------------|
| <b>Acute kidney injury</b>               | CIHI-DAD         | ICD-9 584<br>ICD-10 N17                                                                                                                                                                                                                                                                                                                                                                                                                                                                                                                                                                                                                                                                                                                                                                                                                                                                                   |
| <b>Alcoholism</b>                        | CIHI-DAD         | ICD-9 303, 3050<br>ICD-10 E244, E512, F10, G312, G621, G721, I426, K292, K70, K860, T510, X45, X65, Y15, Y573, Z502, Z714, Z721                                                                                                                                                                                                                                                                                                                                                                                                                                                                                                                                                                                                                                                                                                                                                                           |
| <b>Atrial fibrillation/flutter</b>       | CIHI-DAD         | ICD-9 4273<br>ICD-10 I48                                                                                                                                                                                                                                                                                                                                                                                                                                                                                                                                                                                                                                                                                                                                                                                                                                                                                  |
| <b>Cancer</b>                            | CIHI-DAD         | ICD-9 150, 154, 155, 157, 162, 174, 175, 185, 203, 204, 205, 206, 207, 208, 230<br>ICD-10 971, 980, 982, 984, 985, 986, 987, 988, 989, 990, 991, 993, C15, C18, C19, C20, C22, C25, C34, C50, C56, C61, C82, C83, C85, C91, C92, C93, C94, C95, C00, D00, D01, D02, D05, D07                                                                                                                                                                                                                                                                                                                                                                                                                                                                                                                                                                                                                              |
| <b>Cataract</b>                          | OHIP<br>CIHI-DAD | ICD-9 203, 204, 205, 206, 207, 208, 150, 154, 155, 157, 162, 174, 175, 183, 185<br>ICD-9 366<br>ICD-10 H25, H26, H27, H28                                                                                                                                                                                                                                                                                                                                                                                                                                                                                                                                                                                                                                                                                                                                                                                 |
| <b>Chronic kidney disease</b>            | OHIP<br>CIHI-DAD | Fee code E214, E140, E141<br>ICD-9 4030, 4031, 4039, 4040, 4041, 4049, 582, 583, 580, 581, 584, 585, 586, 587, 5880, 5888, 5889, 5937<br>ICD-10 E102, E112, E132, E142, I12, I13, N08, N18, N19                                                                                                                                                                                                                                                                                                                                                                                                                                                                                                                                                                                                                                                                                                           |
| <b>Chronic liver disease</b>             | OHIP<br>CIHI-DAD | ICD-9 403, 585<br>ICD-9 4561, 4562, 070, 5722, 5723, 5724, 5728, 573, 7824, V026, 2750, 2751, 7891, 7895, 571<br>ICD-10 B16, B17, B18, B19, I85, R17, R18, R160, R162, B942, Z225, E831, E830, K70, K713, K714, K715, K717, K721, K729, K73, K74, K753, K754, K758, K759, K76, K77                                                                                                                                                                                                                                                                                                                                                                                                                                                                                                                                                                                                                        |
| <b>Chronic lung disease</b>              | OHIP<br>CIHI-DAD | ICD-9 571, 573, 070, Fee code Z551, Z554<br>ICD-9 491, 492, 493, 494, 495, 496, 500, 501, 502, 503, 504, 505, 5064, 5069, 5081, 515, 516, 517, 5185, 5188, 5198, 5199, 4168, 4169<br>ICD-10 I272, I278, I279, J40, J41, J42, J43, J44, J45, J47, J60, J61, J62, J63, J64, J65, J66, J67, J68, J701, J703, J704, J708, J709, J82, J84, J92, J941, J949, J953, J961, J969, J984, J988, J989, J99                                                                                                                                                                                                                                                                                                                                                                                                                                                                                                            |
| <b>Congestive heart failure</b>          | OHIP<br>CIHI-DAD | ICD-9 491, 492, 493, 494, 496, 501, 502, 515, 518, 519, Fee code J689, J889<br>ICD-9 425, 5184, 514, 428<br>ICD-10 I500, I501, I509, I255, J81<br>CCP 4961, 4962, 4963, 4964<br>CCI 1HP53, 1HP55, 1HZ53GRFR, 1HZ53LAFR, 1HZ53SYFR                                                                                                                                                                                                                                                                                                                                                                                                                                                                                                                                                                                                                                                                         |
| <b>Coronary artery disease or angina</b> | OHIP<br>CIHI-DAD | ICD-9 428, Fee code R701, R702, Z429<br>ICD-9 410 412, 414, 4292, 4295, 4296, 4297, 413<br>ICD-10 I21, I22, I23, I24, I25, Z955, Z958, Z959, R931, T822, I20<br>CCP 4801, 4802, 4803, 4804, 4805, 481, 482, 483<br>CCI 1IJ26, 1IJ27, 1IJ54, 1IJ57, 1IJ50, 1IJ76                                                                                                                                                                                                                                                                                                                                                                                                                                                                                                                                                                                                                                           |
| <b>Dementia</b>                          | OHIP<br>CIHI-DAD | ICD-9 410, 412, 413, Fee code R741, R742, R743, G298, E646, E651, E652, E654, E655, G262, Z434, Z448<br>ICD-9 2900, 2901, 2903, 2904, 2908, 2909, 2948, 2949, 3310, 3311, 3312, 2941, 797<br>ICD-10 F065, F066, F068, F069, F09, F00, F01, F02, F03, F051, G30, G31, R54                                                                                                                                                                                                                                                                                                                                                                                                                                                                                                                                                                                                                                  |
| <b>Diabetes mellitus</b>                 | OHIP<br>ODB      | ICD-9 290, 331, 797<br>Insulin (Isophane) Beef & Pork, Insulin (Isophane) Human Biosynthetic, Insulin (Isophane) Human Semi-synthetic, Insulin (Isophane) Pork, Insulin (Neutral) Human Semi-synthetic, Insulin (Neutral) Pork, Insulin, (Protamine Zinc) Beef & Pork, Insulin (Sulfated) Beef, Insulin (Zinc) Beef, Insulin (Zinc) Beef & Pork, Insulin (Zinc) Human Biosynthetic, Insulin (Zinc) Human Semi-synthetic, Insulin (Zinc) Pork, Insulin Aspart, Insulin Aspart & Insulin Aspart Protamine, Insulin Detemir, Insulin Glargine, Insulin Glulisine, Insulin Human Bio-synthetic, Insulin Human Semi-synthetic, Insulin Injection Pork, Insulin Isophane Injection Pork, Insulin Lispro, Acarbose, Acetohexamide, Chlorpropamide, Gliclazide, Glimpir, Glyburide, Metformin HCL, Nateglinide, Pioglitazone HCL, Repaglinide, Rosiglitazone Male, Sitagliptin Phosphate Monohydrate, Tolbutamide |
| <b>Glaucoma</b>                          | CIHI-DAD         | ICD-9 365<br>ICD-10 H25, H40, H42                                                                                                                                                                                                                                                                                                                                                                                                                                                                                                                                                                                                                                                                                                                                                                                                                                                                         |
| <b>Hypertension</b>                      | OHIP<br>ODB      | Fee code E132, E133<br>Acebutolol HCL, Aliskiren Fumarate, Amlodipine Besylate, Amlodipine Besylate & Atrovastatin, Atenolol, Atenolol & Chlorthalidone, Benazepril HCL, Bisoprolol Fumarate, Brimonidine Tartrate & Timolol Maleate, Brizolamide Tartrate & Timolol Maleate, Bumetanide, Candesartan Cilexetil, Candesartan Cilexetil & Hydrochlorothizide, Captopril, Carvedilol, Chlorthalidone, Cilazapril, Cilazapril &                                                                                                                                                                                                                                                                                                                                                                                                                                                                              |

|                                    |                  |                                                                                                                                                                                                                                                                                                                                                                                                                                                                                                                                                                                                                                                                                                                                                                                                                                                                                                                                                                                                                                                                                                                                                                                                                                                        |
|------------------------------------|------------------|--------------------------------------------------------------------------------------------------------------------------------------------------------------------------------------------------------------------------------------------------------------------------------------------------------------------------------------------------------------------------------------------------------------------------------------------------------------------------------------------------------------------------------------------------------------------------------------------------------------------------------------------------------------------------------------------------------------------------------------------------------------------------------------------------------------------------------------------------------------------------------------------------------------------------------------------------------------------------------------------------------------------------------------------------------------------------------------------------------------------------------------------------------------------------------------------------------------------------------------------------------|
|                                    |                  | Hydrochlorothizide, Diltiazem HCL, Enalapril Sodium, Enalapril Maleate, Eprosartan Mesylate, Eprosartan Mesylate & Hydrochlorothizide, Erythryl Tetranitrate, Felodipine, Flunarizine HCL, Fosinopril Sodium, Hydralazine HCL, Hydrochlorothizide, Indapamide, Irbesartan, Irbesartan & Hydrochlorothiazide, Hydrochlorothiazide, Hydrochlorothiazide, Labetalol HCL, Lisinopril, Lisinopril & Hydrochlorothiazide, Losartan Potassium, Losartan Potassium & Hydrochlorothiazide, Methyldopa & Hydrochlorothiazide, Metoprolol Tartrate, Minoxidil, Nadolol, Nicardipine HCL, Nifedipine, Nimodipine, Olmesartan Medoxomil, Olmesartan Medoxomil & Hydrochlorothiazide, Oxprenolol HCL, Perindopril Erbamine, Perindopril Erbamine & Indapamine, Phenoxybenzamine, Pindolol, Pindolol & Hydrochlorothiazide, Propanolol HCL, Quinapril HCL & Hydrochlorothiazide, Ramipril, Ramipril & Hydrochlorothiazide, Spironolactone, Spironolactone & Hydrochlorothiazide, Telmisartan, Telmisartan & Hydrochlorothiazide, Timolol Maleate, Timolol Maleate & Hydrochlorothiazide, Timolol Maleate Hydrochlorothiazide e & Travoprost, Trandolapril, Triamterene, Triamterene & Hydrochlorothiazide, Valsartan, Valsartan & Hydrochlorothiazide, Verapamil HCL. |
| <b>Hypotension</b>                 | CIHI-DAD         | ICD-9 458<br>ICD-10 I95                                                                                                                                                                                                                                                                                                                                                                                                                                                                                                                                                                                                                                                                                                                                                                                                                                                                                                                                                                                                                                                                                                                                                                                                                                |
| <b>Macular degeneration</b>        | CIHI-DAD         | ICD-9 362<br>ICD-10 H35                                                                                                                                                                                                                                                                                                                                                                                                                                                                                                                                                                                                                                                                                                                                                                                                                                                                                                                                                                                                                                                                                                                                                                                                                                |
| <b>Obesity</b>                     | OHIP<br>CIHI-DAD | Fee code E154, E125, E126, E147<br>ICD-9 278<br>ICD-10 E66                                                                                                                                                                                                                                                                                                                                                                                                                                                                                                                                                                                                                                                                                                                                                                                                                                                                                                                                                                                                                                                                                                                                                                                             |
| <b>Osteoporosis</b>                | OHIP<br>CIHI-DAD | ICD-9 278<br>ICD-9 733<br>ICD-10 M80, M81                                                                                                                                                                                                                                                                                                                                                                                                                                                                                                                                                                                                                                                                                                                                                                                                                                                                                                                                                                                                                                                                                                                                                                                                              |
| <b>Parkinson's disease</b>         | OHIP<br>CIHI-DAD | ICD-9 733<br>ICD-9 332<br>ICD-10 G20, F023                                                                                                                                                                                                                                                                                                                                                                                                                                                                                                                                                                                                                                                                                                                                                                                                                                                                                                                                                                                                                                                                                                                                                                                                             |
| <b>Peripheral vascular disease</b> | CIHI-DAD         | ICD-9 4402, 4408, 4409, 5571, 4439, 444<br>ICD-10 I700, I702, I708, I709, I731, I738, I739, K551<br>CCP 5125, 5126, 5129, 5159, 5014, 5016, 5018, 5028, 5038<br>CCI 1KA76, 1KA50, 1KE76, 1KG50, 1KG57, 1KG76MI, 1KG87, 1IA87, 1IB87, 1IC87, 1ID87, 1KA87, 1KE57                                                                                                                                                                                                                                                                                                                                                                                                                                                                                                                                                                                                                                                                                                                                                                                                                                                                                                                                                                                        |
| <b>Prostate Cancer</b>             | OHIP<br>OHIP     | Fee code R787, R780, R797, R804, R809, R875, R815, R936, R783, R784, R785, E626, R814, R786, R937, R860, R861, R855, R856, R933, R934, R791, E672, R794, R813, R867, E649<br>Fee code A355, A356, A353, A935, A354, C355, C356, C353, C935, C354 A345, A745, A346, A343, A340, A341, A348 C345, C745, C346, C343, C340, C341, C348 A445, A845, A446, A443, A444, A441, A448, C445, C845, C446, C443, C444, C441, C448 with ICD-9 185                                                                                                                                                                                                                                                                                                                                                                                                                                                                                                                                                                                                                                                                                                                                                                                                                   |
| <b>Rheumatoid arthritis</b>        | CIHI-DAD         | ICD-9 714<br>ICD-10 M05, M06                                                                                                                                                                                                                                                                                                                                                                                                                                                                                                                                                                                                                                                                                                                                                                                                                                                                                                                                                                                                                                                                                                                                                                                                                           |
| <b>Seizure</b>                     | OHIP<br>CIHI-DAD | ICD-9 714<br>ICD-9 345, 7803<br>ICD-10 G40, G41                                                                                                                                                                                                                                                                                                                                                                                                                                                                                                                                                                                                                                                                                                                                                                                                                                                                                                                                                                                                                                                                                                                                                                                                        |
| <b>Stroke or TIA</b>               | CIHI-DAD         | ICD-9 430, 431, 436, 432, 4340, 4341, 4349, 3623, 435<br>ICD-10 I600, I601, I602, I603, I604, I605, I606, I607, I609, I61, I630, I631, I632, I633, I634, I635, I638, I639, I64, I92, H341, G450, G451, G452, G453, G458, G459, H340                                                                                                                                                                                                                                                                                                                                                                                                                                                                                                                                                                                                                                                                                                                                                                                                                                                                                                                                                                                                                    |

Data sources included CIHI-DAD (inpatient discharge abstracts), OHIP (physician billings) and ODB (universal medication coverage). CIHI-DAD used ICD-10 (for diagnostic coding) and CCI coding (for interventions) after April 1, 2002, and ICD-9/CCP coding prior to this. Specific ICD 9/10 and CCP/CCI codes, and medication classes used to define hypertension and diabetes are defined above. The presence of any data element was considered evidence of the comorbidity. A look-back window of 5 years prior to index date was used for all conditions, aside from prior falls and fractures (1 year look-back), and hypertension and diabetes (6 month look-back).

**eTable 2b.** Specific drugs included within each medication class. Approximately 7,400 individual Drug Identification Numbers (DINs) were used to identify relevant brands and doses.

| <b>Medication class</b>             | <b>Medications</b>                                                                                                                                                                                                                                                                                                                                                                                                                                                                                                                                                                                                                                                                                                                                                                                                                                                                                                                                                                                                                                                                                                                                                                                                                                                                                                                                                                                                                                                                                                                                                                                                                                                                                                                                                                                                                                                                                                                                                                                                                                                                                                                                                                                                                                                                                                                                                                                                                         |
|-------------------------------------|--------------------------------------------------------------------------------------------------------------------------------------------------------------------------------------------------------------------------------------------------------------------------------------------------------------------------------------------------------------------------------------------------------------------------------------------------------------------------------------------------------------------------------------------------------------------------------------------------------------------------------------------------------------------------------------------------------------------------------------------------------------------------------------------------------------------------------------------------------------------------------------------------------------------------------------------------------------------------------------------------------------------------------------------------------------------------------------------------------------------------------------------------------------------------------------------------------------------------------------------------------------------------------------------------------------------------------------------------------------------------------------------------------------------------------------------------------------------------------------------------------------------------------------------------------------------------------------------------------------------------------------------------------------------------------------------------------------------------------------------------------------------------------------------------------------------------------------------------------------------------------------------------------------------------------------------------------------------------------------------------------------------------------------------------------------------------------------------------------------------------------------------------------------------------------------------------------------------------------------------------------------------------------------------------------------------------------------------------------------------------------------------------------------------------------------------|
| <b>5 alpha reductase inhibitor</b>  | Finasteride, Dutasteride                                                                                                                                                                                                                                                                                                                                                                                                                                                                                                                                                                                                                                                                                                                                                                                                                                                                                                                                                                                                                                                                                                                                                                                                                                                                                                                                                                                                                                                                                                                                                                                                                                                                                                                                                                                                                                                                                                                                                                                                                                                                                                                                                                                                                                                                                                                                                                                                                   |
| <b>ACE inhibitors or ARBs</b>       | Ramipril, Ramipril & Hydrochlorothiazide, Trandolapril, Candesartan Cilexetil, Candesartan Cilexetil & Hydrochlorothiazide, Eprosartan Mesylate, Eprosartan Mesylate & Hydrochlorothiazide, Irbesartan, Irbesartan & Hydrochlorothiazide, Losartan potassium, Losartan potassium & Hydrochlorothiazide, Olmesartan Medoxomil, Olmesartan Medoxomil & Hydrochlorothiazide, Telmisartan, Telmisartan & Hydrochlorothiazide, Valsartan, Valsartan & Hydrochlorothiazide                                                                                                                                                                                                                                                                                                                                                                                                                                                                                                                                                                                                                                                                                                                                                                                                                                                                                                                                                                                                                                                                                                                                                                                                                                                                                                                                                                                                                                                                                                                                                                                                                                                                                                                                                                                                                                                                                                                                                                       |
| <b>Androgen deprivation therapy</b> | Buserelin Acetate, Goserelin Acetate, Leuprolide, Leuprolide Acetate                                                                                                                                                                                                                                                                                                                                                                                                                                                                                                                                                                                                                                                                                                                                                                                                                                                                                                                                                                                                                                                                                                                                                                                                                                                                                                                                                                                                                                                                                                                                                                                                                                                                                                                                                                                                                                                                                                                                                                                                                                                                                                                                                                                                                                                                                                                                                                       |
| <b>Anti-inflammatory</b>            | Cannabidiol & Dronabinol, Celecoxib, Diclofenac sodium & Misoprostol, Diflunisal, Etodolac, Fenoprofen calcium, Floctafenine, Flurbiprofen, Glucosamine & Chondroitin, Ibuprofen, Indomethacin, Ketoprofen, Ketoralac Tromethamine, Mefenamic Acid, Meloxicam, Nabumetone, Naproxen, Naproxen sodium, Oxaprozin, Phenylbutazone, Piroxicam, Rofecoxib, Sulindac, Tenoxicam, Tiaprofenic acid, Tolmetin sodium, Valdecoxib                                                                                                                                                                                                                                                                                                                                                                                                                                                                                                                                                                                                                                                                                                                                                                                                                                                                                                                                                                                                                                                                                                                                                                                                                                                                                                                                                                                                                                                                                                                                                                                                                                                                                                                                                                                                                                                                                                                                                                                                                  |
| <b>Antiandrogens</b>                | Bicalutamide, Cyproterone, Cyproterone Acetate, Flutamide, Nilutamide                                                                                                                                                                                                                                                                                                                                                                                                                                                                                                                                                                                                                                                                                                                                                                                                                                                                                                                                                                                                                                                                                                                                                                                                                                                                                                                                                                                                                                                                                                                                                                                                                                                                                                                                                                                                                                                                                                                                                                                                                                                                                                                                                                                                                                                                                                                                                                      |
| <b>Antibiotic</b>                   | Amikacin Sulphate, Amoxicillin, Amoxicillin & Clavulanic Acid Potassium, Amoxicillin Trihydrate, Amoxicillin Trihydrate & Clavulanic Acid Potassium, Ampicillin, Ampicillin Sodium, Ampicillin Trihydrate, Azithromycin, Azithromycin Dihydrate, Bacampicillin HCL, Bacitracin, Bacitracin Zinc & Cysteine & Glycine & Neomycin Sulphate & Threonine, Bacitracin Zinc & Neomycin Sulphate & Polymyxin B Sulphate, Bacitracin Zinc & Polymyxin B Sulphate, Carbenicillin, Carbenicillin Disodium, Cefaclor, Cefadroxil, Cefadroxil Monohydrate, Cefazolin Sodium, Cefepime HCL, Cefixime, Cefoperazone Sodium, Cefotaxime Sodium, Cefoxitin Sodium, Cefprozil, Ceftazidime Sodium, Ceftazidime Hydrate, Ceftriaxone Sodium, Cefuroxime Axetil, Cephalexin, Cephalexin Monohydrate, Cephradine, Ciprofloxacin, Ciprofloxacin HCL, Ciprofloxacin HCL & Dexamethasone, Clindamycin, Clindamycin Phosphate, Clindamycin Phosphate & Glycolic Acid, Cloxacillin, Cloxacillin Sodium, Colistin Sodium Methanesulfonate, Daptomycin, Dicloxacillin Sodium, Erythromycin, Erythromycin Estolate, Erythromycin Ethyl Succinate, Erythromycin Ethyl Succinate & Sulfoxazole, Erythromycin Gluceptate, Erythromycin Lactobionate, Erythromycin Stearate, Flucloxacillin Sodium, Fluocinolone Acetonide & Neomycin Sulphate & Polymyxin B Sulphate, Framycetin Sulphate, Fusidic Acid, Fusidic Acid Sodium, Gatifloxacin, Gentamicin, Gentamicin & Colistin, Gentamicin Sulphate, Garamicidin & Neomycin & Polymyxin B Sulphate, Garamicidin & Polymyxin B Sulphate, Grepafloxacin HCL, Levofloxacin, Linezolid, Moxifloxacin HCL, Mupirocin, Neomycin Sulphate, Neomycin Sulphate & Polymyxin B Sulphate, Netilmicin Sulphate, Norfloxacin, Ofloxacin, Paromomycin, Penicillin G Benzathine, Penicillin G Potassium, Penicillin G Procain Salt, Penicillin G Sodium, Penicillin V, Penicillin V Benzathine, Penicillin V Potassium, Piperacillin, Piperacillin Sodium & Tazobactam Sodium, Pivampicillin, Pivmecillinam, Polymyxin B Sulphate & Trimethoprim, Spectinomycin HCL, Spiramycin, Streptomycin, Streptomycin Sulphate, Sulfabenzamide & Sulfacetamide & Sulfathiazole, Sulfacetamide Sodium, Sulfadiazine, Sulfadiazine & Trimethoprim, Sulfamethoxazole, Sulfamethoxazole & Trimethoprim, Sulfapyridine, Sulfisoxazole, Telithromycin, Tobramycin, Tobramycin Sulphate, Trimethoprim, Azithromycin, Azithromycin Dihydrate, Clarithromycin |
| <b>Anticoagulant</b>                | Enoxaparin, Dalteparin Sodium, Tinzaparin Sodium, Nadroparin Calc, Enoxaparin Sodium, Dabigatran Etxilate, Rivaroxaban, Fondaparinux Sodium, Lepirudin, Heparin Sodium, Coumadin, Heparin, Heparin Calcium, Danaparoid Sodium                                                                                                                                                                                                                                                                                                                                                                                                                                                                                                                                                                                                                                                                                                                                                                                                                                                                                                                                                                                                                                                                                                                                                                                                                                                                                                                                                                                                                                                                                                                                                                                                                                                                                                                                                                                                                                                                                                                                                                                                                                                                                                                                                                                                              |
| <b>Anticonvulsants</b>              | Carbamazepine, Clobazam, Clonazepam, Divalproex sodium, Ethosuximide, Fosphenytoin, Gabapentin, Lacosamide, Lamotrigine, Levetiracetam, Magnesium pyrogluconate, Magnesium sulphate, Mephenytoin, Mephobarbital, Methsuximide, Oxcarbazepine, Phenobarbital, Phensuximide, Phenytoin, Phenytoin sodium, Pregabalin, Primidone, Secobarbital sodium, Topiramate, Valproate sodium, Valproic acid, Vigabatrin                                                                                                                                                                                                                                                                                                                                                                                                                                                                                                                                                                                                                                                                                                                                                                                                                                                                                                                                                                                                                                                                                                                                                                                                                                                                                                                                                                                                                                                                                                                                                                                                                                                                                                                                                                                                                                                                                                                                                                                                                                |
| <b>Antidepressants</b>              | Amitriptyline, Amitriptyline HCL, Amitriptyline HCL & Baclofen, Amitriptyline HCL & Perphenazine, Amoxapine, Bupropion HCL, Clomipramine HCL, Desipramine HCL, Doxepine HCL, Duloxetine, Imipramine, Imipramine HCL, Isocarboxazid, Maprotiline HCL, Mirtazapine, Moclobemide, Nortriptyline, Nortriptyline HCL, Phenelzine sulphate, Protriptyline HCL, Selegiline HCL, Tranylcypromine sulphate, Trazadone HCL, Trimipramine, Trimipramine maleate                                                                                                                                                                                                                                                                                                                                                                                                                                                                                                                                                                                                                                                                                                                                                                                                                                                                                                                                                                                                                                                                                                                                                                                                                                                                                                                                                                                                                                                                                                                                                                                                                                                                                                                                                                                                                                                                                                                                                                                       |
| <b>Antineoplastic</b>               | Abatacept, Aldesleukin, Alemtuzumab, Altretamine, Aminoglutethimide,                                                                                                                                                                                                                                                                                                                                                                                                                                                                                                                                                                                                                                                                                                                                                                                                                                                                                                                                                                                                                                                                                                                                                                                                                                                                                                                                                                                                                                                                                                                                                                                                                                                                                                                                                                                                                                                                                                                                                                                                                                                                                                                                                                                                                                                                                                                                                                       |

|                                  |                                                                                                                                                                                                                                                                                                                                                                                                                                                                                                                                                                                                                                                                                                                                                                                                                                                                                                                                                                                                                                                                                                                                                                |
|----------------------------------|----------------------------------------------------------------------------------------------------------------------------------------------------------------------------------------------------------------------------------------------------------------------------------------------------------------------------------------------------------------------------------------------------------------------------------------------------------------------------------------------------------------------------------------------------------------------------------------------------------------------------------------------------------------------------------------------------------------------------------------------------------------------------------------------------------------------------------------------------------------------------------------------------------------------------------------------------------------------------------------------------------------------------------------------------------------------------------------------------------------------------------------------------------------|
|                                  | Anastrozole, Asparaginase, Azathioprine, Bicalutamide, Bleomycin Sulphate, Buserelin Acetate, Busulfan, Capecitabine, Carmustine, Chlorambucil, Cladribine, Cyclophosphamide, Cyproterone Acetate, Cytarabine, Decarbazine, Dasatinib Monohydrate, Daunorubicin, Degarelix Acetate, Diethylstilbestrol, Diethylstilbestrol Diphosphate Sodium, Doxorubicin HCL, Efalizumab, Epirubicin HCL, Erlotinib HCL, Estramustine Phosphate Disodium, Etoposide, Everolimus, Exemestane, Fludarabine Phosphate Sodium, Fluorouracil, Flutamide, Formestane, Goserelin Acetate, Hydroxyurea, Imatinib Mesylate, Interferon, Interferon Alfa-2B, Irinotecan HCL, Lanreotide, Lenalidomide, Letrozole, Leuprolide Acetate, Levamisole HCL, Lomustine, Mechlorethamine HCL, Megestrol Acetate, Melphalan, Mercaptopurine, Methotrexate Sodium, Mitomycin, Mitotane, Nilotinib HCL Monohydrate, Nilutamide, Profimer Sodium, Procarbazine HCL, Rituximab, Sirolimus, Sorafenib, Sunitinib Malate, Tacrolimus, Tamoxifen Citrate, Temozolomide, Thioguanine, Thiotepa, Tretinoin, Triptorelin, Triptorelin Pamoate, Vaccine- B.C.G, Vinblastine Sulphate, Vincristine Sulphate |
| <b>Antiparkinson drugs</b>       | Benserazide HCL & Levodopa, Benztropine Mesylate, Biperiden HCL, Bromocriptine Mesylate, Carbidopa & Entacapone & Levodopa, Carbidopa & Levodopa, Entacapone, Pergolide Mesylate, Pramipexole HCL, Procyclidine HCL, Profenamine HCL, Rasagiline Mesylate, Ropinirole HCL, Selegiline HCL, Trihexyphenidyl HCL                                                                                                                                                                                                                                                                                                                                                                                                                                                                                                                                                                                                                                                                                                                                                                                                                                                 |
| <b>Antiplatelet</b>              | Ticlopidine HCL, Ticlopidine, Clopidogrel, Clopidogrel Bisulphate, Prasugrel HCL, Dipyridamole, Acetylsalicylic Acid & Dipyridamole                                                                                                                                                                                                                                                                                                                                                                                                                                                                                                                                                                                                                                                                                                                                                                                                                                                                                                                                                                                                                            |
| <b>Antipsychotic (atypical)</b>  | Risperidone, Quetiapine fumarate, Olanzapine                                                                                                                                                                                                                                                                                                                                                                                                                                                                                                                                                                                                                                                                                                                                                                                                                                                                                                                                                                                                                                                                                                                   |
| <b>Antipsychotic (other)</b>     | Chlorpromazine HCL, Clozapine, Flupenthixol decanoate, Flupenthixol HCL, Fluphenazine decanoate, Fluphenazine HCL, Haloperidol, Haloperidol decanoate, Loxapine HCL, Loxapine succinate, Mesoridazine besylate, Methotrimeprazine, Olanzapine tartrate, Paliperidone, Pericyazine, Perphenazine, Pimozide, Pipotiazine palmitate, Prochlorperazine maleate, Prochlorperazine mesylate, Risperidone, Thioridazine HCL, Thiothixene, Trifluoperazine HCL, Ziprasidone HCL, Zuclopenthixol acetate, Zuclopenthixol decanoate, Zuclopenthixol dihydrochloride                                                                                                                                                                                                                                                                                                                                                                                                                                                                                                                                                                                                      |
| <b>Benzodiazepine</b>            | Alprazolam, Bromazepam, Chlordiazepoxide HCL, Chlordiazepoxide HCL & Clidinium Bromide, Clobazam, Clonazepam, Clorazepate Dipotassium, Diazepam, Diazepam & Methylcellulose, Estazolam, Flumazenil, Flurazepam HCL, Ketazolam, Lorazepam, Midazolam HCL, Nitrazepam, Oxazepam, Temazepam, Triazolam, Zaleplon, Zopiclone                                                                                                                                                                                                                                                                                                                                                                                                                                                                                                                                                                                                                                                                                                                                                                                                                                       |
| <b>Beta blockers</b>             | Acebutolol HCL, Atenolol, Atenolol & Chlorthalidone, Betaxolol HCL, Bisoprolol fumarate, Brimonidine tartrate & Timolol maleate, Carvedilol, Brinzolamide & Timolol maleate, Labetalol HCL, Metoprolol tartrate, Nadolol, Oxprenolol HCL, Pindolol, Pindolol & Hydrochlorothiazide, Propranolol HCL, Propranolol HCL & Hydrochlorothiazide, Sotalol HCL, Timolol maleate, Timolol maleate & Travoprost                                                                                                                                                                                                                                                                                                                                                                                                                                                                                                                                                                                                                                                                                                                                                         |
| <b>Bisphosphonate</b>            | Alendronate, Alendronate Sodium, Alendronate Sodium & Cholecalciferol, Calcium Carbonate & Etidronic Acid, Calcium Carbonate & Etidronic Acid Sodium, Calcium Carbonate & Risedronate Sodium, Clodronate Disodium, Clodronate Acid Disodium, Etidronate & Calcium Carbonate, Etidronate Disodium, Etidronic Acid Disodium, Ibandronate, Pamidronate Disodium, Pamidronic Acid Disodium, Risedronate Sodium & Calcium, Risedronate Sodium & Calcium & Vitamin D3, Zoledronic Acid                                                                                                                                                                                                                                                                                                                                                                                                                                                                                                                                                                                                                                                                               |
| <b>Calcium channel blockers</b>  | Amlodipine besylate, Amlodipine besylate & Atorvastatin, Diltiazem HCL, Erythryl Tetranitrate, Felodipine, Flunarizine HCL, Nifedipine, Nicardipine HCL, Nimodipine, Verapamil HCL                                                                                                                                                                                                                                                                                                                                                                                                                                                                                                                                                                                                                                                                                                                                                                                                                                                                                                                                                                             |
| <b>Cholinesterase inhibitors</b> | Aricept, Mylan-Galantamine ER, Pat-Galantamine ER, Sandoz-Rivastigmine, Ratio-Rivastigmine, PMS-Rivastigmine, Teva-Rivastigmine, APO-Rivastigmine, Mylan-Rivastigmine, Exelon, Reminyl ER                                                                                                                                                                                                                                                                                                                                                                                                                                                                                                                                                                                                                                                                                                                                                                                                                                                                                                                                                                      |
| <b>Denosumab</b>                 | Denosumab, Denosumab Recombinant, Pamidronic Acid Disodium, Tiludronate Disodium                                                                                                                                                                                                                                                                                                                                                                                                                                                                                                                                                                                                                                                                                                                                                                                                                                                                                                                                                                                                                                                                               |
| <b>Digoxin</b>                   | Digoxin                                                                                                                                                                                                                                                                                                                                                                                                                                                                                                                                                                                                                                                                                                                                                                                                                                                                                                                                                                                                                                                                                                                                                        |
| <b>Glucocorticoids</b>           | Budenoside, Methylprednisone, Hydrocortisone, Dexamethasone, Betamethasone, Triamcin, Cortisone, Fludrocortisone,                                                                                                                                                                                                                                                                                                                                                                                                                                                                                                                                                                                                                                                                                                                                                                                                                                                                                                                                                                                                                                              |
| <b>Glucose test strip</b>        | Diagnostic Agent- Diabetes, Glucose, Blood Tests, Glucose, Urine Tests, Non Pharmaceutical Ingredient                                                                                                                                                                                                                                                                                                                                                                                                                                                                                                                                                                                                                                                                                                                                                                                                                                                                                                                                                                                                                                                          |
| <b>Inhaled acetylcholine</b>     | Ipratropium Bromide, Tiotropium Bromide                                                                                                                                                                                                                                                                                                                                                                                                                                                                                                                                                                                                                                                                                                                                                                                                                                                                                                                                                                                                                                                                                                                        |
| <b>Inhaled beta-agonist</b>      | Methaproterenol Sulfate, Albuterol, Albuterol & Albuterol Sulfate, Albuterol Sulfate, Fenoterol HBR, Zenhale, Foradil, Oxeze, Pirbuterol Acetate, Procatamol HCL, Salmeterol Xinafoate, Formoterol & Mometasone, Formoterol Fumarate, Terbutaline Sulfate, Fluticasone Propionate & Salmeterol Xinafoate, Budesonide & Formoterol Fumarate, Albuterol Sulfate & Ipratropium Bromide                                                                                                                                                                                                                                                                                                                                                                                                                                                                                                                                                                                                                                                                                                                                                                            |
| <b>Inhaled corticosteroid</b>    | Beclomethasone Dipropionate, Budesonide, Ciclesonide, Flunisolide, Fluticasone Propionate, Triamcinolone Acetonide                                                                                                                                                                                                                                                                                                                                                                                                                                                                                                                                                                                                                                                                                                                                                                                                                                                                                                                                                                                                                                             |

|                                                |                                                                                                                                                                                                                                                                                                                                                                                                                                                                                                                                                                                                                                                                                                                                                                                                                                                                                                                                                                                                                                                                                                                                                                                                                                                                                                                                                                                                                                                                                                                                                                                                                                                                                                                                                                                                                                                                                                                                                                                                                                                                                                                                                                                                                                                                                                                                                                                                                                                                                                                                                                                                                                                                        |
|------------------------------------------------|------------------------------------------------------------------------------------------------------------------------------------------------------------------------------------------------------------------------------------------------------------------------------------------------------------------------------------------------------------------------------------------------------------------------------------------------------------------------------------------------------------------------------------------------------------------------------------------------------------------------------------------------------------------------------------------------------------------------------------------------------------------------------------------------------------------------------------------------------------------------------------------------------------------------------------------------------------------------------------------------------------------------------------------------------------------------------------------------------------------------------------------------------------------------------------------------------------------------------------------------------------------------------------------------------------------------------------------------------------------------------------------------------------------------------------------------------------------------------------------------------------------------------------------------------------------------------------------------------------------------------------------------------------------------------------------------------------------------------------------------------------------------------------------------------------------------------------------------------------------------------------------------------------------------------------------------------------------------------------------------------------------------------------------------------------------------------------------------------------------------------------------------------------------------------------------------------------------------------------------------------------------------------------------------------------------------------------------------------------------------------------------------------------------------------------------------------------------------------------------------------------------------------------------------------------------------------------------------------------------------------------------------------------------------|
| <b>Narcotics</b>                               | Acetaminophen & Caffeine & Codeine, Acetaminophen & Caffeine & Codeine Phosphate, Acetaminophen & Caffeine Citrate & Codeine Phosphate, Acetaminophen & Chlorzoxazone & Codeine, Acetaminophen & Chlorzoxazone & Codeine Phosphate, Acetaminophen & Codeine & Doxylamine, Acetaminophen & Codeine Phosphate, Acetaminophen & Dextromethorphan Hbr & Doxylamine & Pseudoephedrine Hcl, Acetaminophen & Dextromethorphan Hbr & Doxylamine Succinate & Pseudoephedrine Hcl, Acetaminophen & Oxycodone Hcl, Acetaminophen & Pseudoephedrine Hcl, Acetylsalicylic Acid & Caffeine & Codeine Phosphate, Acetylsalicylic Acid & Caffeine & Dextropropoxyphene Hcl, Acetylsalicylic Acid & Caffeine & Propoxyphene Hcl, Acetylsalicylic Acid & Codeine Phosphate, Acetylsalicylic Acid & Oxycodone Hcl, Alfentanil Hcl, Ammonium Chloride & Codeine Phosphate & Guaifenesin, Analgesics, Anileridine Hcl, Atropine Sulfate & Attapulgit & Hyoscyamine Sulfate & Opium Powder & Pectin & Scopolamine Hbr, Belladonna & Opium, Belladonna Extract For Oral Use & Opium Powder, Codeine, Codeine Phosphate, Dextromethorphan Hbr & Guaifenesin & Menthol, Dextropropoxyphene Hcl, Dextropropoxyphene Napsylate, Diamorphine Hcl, Fentanyl, Fentanyl & Baclofen, Fentanyl & Bupivacaine, Fentanyl & Bupivacaine & Baclofen, Fentanyl & Bupivacaine & Clonidine, Fentanyl & Bupivacaine & Clonidin & Baclofen, Fentanyl & Clonidine Hcl, Fentanyl Citrate, Hydromorphone Bitartrate & Ibuprofen, Hydromorphone, Hydromorphone & Baclofen, Hydromorphone & Bupivacaine & Baclofen, Hydromorphone & Bupivacaine, Hydromorphone & Bupivacaine & Baclofen, Hydromorphone & Bupivacaine & Baclofen & Clonidine, Hydromorphone & Bupivacaine & Clonidine, Hydromorphone Hbr, Hydromorphone Hcl, Ibuprofen & Diphenhydramine Hcl, Levorphanol Tartrate, Meperidine Hcl, Meperidine Hcl & Promethazine Hcl, Morphine, Morphine & Baclofen, Morphine & Bupivacaine, Morphine, Morphine & Baclofen, Morphine & Liorsesal, Morphine Hcl, Morphine Succinate, Morphine Sulfate, Naloxone Hcl & Oxycodone Hcl, Opium, Narcotic Compound, Opium & Belladonna, Opium & Camphor, Opium Tincture, Oxycodone Hcl, Oxymorphone Hcl, Propoxyphene Hcl, Remifentanil Hcl, Sufentanil Citrate, Tapentadol Hcl, Tramadol, Tramadol Hcl, Bupivacaine & Fentanyl, Fentanyl & Baclofen & Clonidine, Fentanyl & Bupivacaine, Fentanyl & Bupivacaine & Clonidine, Fentanyl & Bupivacaine & Clonidine & Baclofen, Hydromorphone & Bupivacaine & Clonidine, Morphine & Bupivacaine, Acetylsalicylic Acid & Caffeine & Pentazocine Hcl, Butorphanol Tartrate, Nalbuphine Hcl, Pentazocine Lactate, Pentazocine Hcl |
| <b>Non-potassium sparing diuretics</b>         | Bumetanide, Ethacrynic Acid, Furosemide, Chlorthalidone, Hydrochlorothiazide, Indapamide, Methyldopa & Hydrochlorothiazide, Metolazone, Timolol Maleate & Hydrochlorothiazide                                                                                                                                                                                                                                                                                                                                                                                                                                                                                                                                                                                                                                                                                                                                                                                                                                                                                                                                                                                                                                                                                                                                                                                                                                                                                                                                                                                                                                                                                                                                                                                                                                                                                                                                                                                                                                                                                                                                                                                                                                                                                                                                                                                                                                                                                                                                                                                                                                                                                          |
| <b>Overactive bladder medication</b>           | Darifenacin, Flavoxate HCL, Oxybutynin, Oxybutynin Chloride, Solifenacin Succinate, Tolterodine Tartrate, Trospium Chloride, Trospium Hydroxide Chloride                                                                                                                                                                                                                                                                                                                                                                                                                                                                                                                                                                                                                                                                                                                                                                                                                                                                                                                                                                                                                                                                                                                                                                                                                                                                                                                                                                                                                                                                                                                                                                                                                                                                                                                                                                                                                                                                                                                                                                                                                                                                                                                                                                                                                                                                                                                                                                                                                                                                                                               |
| <b>Potassium sparing diuretics</b>             | Amiloride HCL, Amiloride HCL & Hydrochlorothiazide, Epleronone, Spironolactone, Spironolactone & Hydrochlorothiazide, Triamterene, Triamterene & Hydrochlorothiazide,                                                                                                                                                                                                                                                                                                                                                                                                                                                                                                                                                                                                                                                                                                                                                                                                                                                                                                                                                                                                                                                                                                                                                                                                                                                                                                                                                                                                                                                                                                                                                                                                                                                                                                                                                                                                                                                                                                                                                                                                                                                                                                                                                                                                                                                                                                                                                                                                                                                                                                  |
| <b>Proton Pump inhibitors</b>                  | Amoxicillin Trihydrate & Clarithromycin & Lansoprazole, Dexlansoprazole, Esomeprazole Magnesium, Lansoprazole, Lansoprazole Sodium, Omeprazole, Omeprazole Magnesium, Pantoprazole, Pantoprazole Magnesium, Pantoprazole Sodium, Rabeprazole Sodium                                                                                                                                                                                                                                                                                                                                                                                                                                                                                                                                                                                                                                                                                                                                                                                                                                                                                                                                                                                                                                                                                                                                                                                                                                                                                                                                                                                                                                                                                                                                                                                                                                                                                                                                                                                                                                                                                                                                                                                                                                                                                                                                                                                                                                                                                                                                                                                                                    |
| <b>Selective Serotonin Reuptake Inhibitors</b> | Fluoxetine HCL, Fluvoxamine Maleate, Paroxetine HCL, Sertraline HCL, Fluoxetine, Sertraline, Citalopram HBR, Escitalopram Oxalate, Citalopram Hydrobromide, Nefazodone HCL,                                                                                                                                                                                                                                                                                                                                                                                                                                                                                                                                                                                                                                                                                                                                                                                                                                                                                                                                                                                                                                                                                                                                                                                                                                                                                                                                                                                                                                                                                                                                                                                                                                                                                                                                                                                                                                                                                                                                                                                                                                                                                                                                                                                                                                                                                                                                                                                                                                                                                            |
| <b>Smoking cessation aid</b>                   | Varenicline Tartrate, Bupropion HCL, Nicotine                                                                                                                                                                                                                                                                                                                                                                                                                                                                                                                                                                                                                                                                                                                                                                                                                                                                                                                                                                                                                                                                                                                                                                                                                                                                                                                                                                                                                                                                                                                                                                                                                                                                                                                                                                                                                                                                                                                                                                                                                                                                                                                                                                                                                                                                                                                                                                                                                                                                                                                                                                                                                          |
| <b>Statins</b>                                 | Atorvastatin, Cerivastatin Sodium, Fluvastatin Sodium, Lovastatin, Provastatin Sodium, Rosuvastatin Calcium, Simvastatin                                                                                                                                                                                                                                                                                                                                                                                                                                                                                                                                                                                                                                                                                                                                                                                                                                                                                                                                                                                                                                                                                                                                                                                                                                                                                                                                                                                                                                                                                                                                                                                                                                                                                                                                                                                                                                                                                                                                                                                                                                                                                                                                                                                                                                                                                                                                                                                                                                                                                                                                               |
| <b>Testosterone replacement</b>                | Androderm, Testosterone Cypionate, Androgel, Testim, Testosterone Enanthate, Testosterone Propionate, Testosterone Cypionate, Testosterone, Methyltestosterone, Testosterone Powder, Testosterone Decanoate                                                                                                                                                                                                                                                                                                                                                                                                                                                                                                                                                                                                                                                                                                                                                                                                                                                                                                                                                                                                                                                                                                                                                                                                                                                                                                                                                                                                                                                                                                                                                                                                                                                                                                                                                                                                                                                                                                                                                                                                                                                                                                                                                                                                                                                                                                                                                                                                                                                            |

Data source was the ODB, which provides universal medication coverage to all people over 65 years of age. Each medication is identified with a unique and permanent DIN. The presence of any medication within the medication class in the 6 months prior to the index date was considered evidence of recent or current medication usage.



**eTable 2c.** Administrative data definitions used to define medical investigations and procedures.

| Variable                                    | Database             | Codes                                                                                                                                                                                                   |
|---------------------------------------------|----------------------|---------------------------------------------------------------------------------------------------------------------------------------------------------------------------------------------------------|
| <b>Bone mineral density test</b>            | OHIP                 | Fee code J654, J688, J854, J888, X149, X152, X153, X155, Y654, Y688, Y854, Y888                                                                                                                         |
| <b>Bone scan</b>                            | OHIP                 | Fee code J850, J650, J852, J862                                                                                                                                                                         |
| <b>Cardiac catheterization</b>              | CIHI-DAD/SDS         | CCP 4995, 4996, 4997<br>CCI 3IJ30GP, 3HZ30GP, 2HZ24GPKJ, 2HZ24GPKL, 2HZ24GPKM, 2HZ24GPXJ, 2HZ28GPPL, 2HZ71GP                                                                                            |
| <b>Cardiac stress test</b>                  | OHIP<br>CIHI-DAD/SDS | Fee code G296, G297, G299, G300, G301, G304, G305, G306<br>CCP 0341, 0342, 0343, 0344, 0605<br>CCI 2HZ08, 3IP70                                                                                         |
| <b>Carotid endarterectomy</b>               | OHIP                 | Fee code N220, R792                                                                                                                                                                                     |
| <b>Carotid ultrasound</b>                   | CIHI-DAD/SDS         | CCP 0281<br>CCI 3JE30, 3JG30                                                                                                                                                                            |
| <b>Chest x-ray</b>                          | OHIP                 | Fee code J201, J501, J190, J191, J490, J491, J492                                                                                                                                                       |
| <b>CT head</b>                              | OHIP                 | Fee code X090, X091, X092, X195                                                                                                                                                                         |
| <b>CT spine</b>                             | OHIP                 | Fee code X188, X400, X401, X402, X405, X408                                                                                                                                                             |
| <b>Echocardiography</b>                     | CIHI-DAD/SDS         | CCP 0282<br>CCI 3IP30                                                                                                                                                                                   |
|                                             | OHIP                 | Fee code G560, G561, G562, G566, G567, G568, G570, G571, G572, G574, G575, G576, G577, G578, G581                                                                                                       |
| <b>EEG</b>                                  | OHIP                 | Fee code G414, G415, G416, G417, G418, G540, G542, G544, G545, G546, G554, G555                                                                                                                         |
| <b>Heart valve replacement</b>              | OHIP                 | Fee code R728, R735, R738, R772                                                                                                                                                                         |
| <b>Holter monitoring</b>                    | CIHI-DAD/SDS         | CCP 0354<br>CCI 2HZ24JAKH                                                                                                                                                                               |
|                                             | OHIP                 | Fee code G311, G320, G647, G648, G649, G650, G651, G652, G653, G654, G655, G656, G657, G658, G659, G660, G661, G682, G683, G684, G685, G686, G687, G688, G689, G690, G692, G693                         |
| <b>Prostate-specific antigen (PSA) test</b> | OHIP                 | Fee code L354, L358                                                                                                                                                                                     |
| <b>Pulmonary function test</b>              | OHIP                 | Fee code J301, J303, J304, J305, J306, J307, J308, J309, J310, J311, J313, J315, J316, J317, J318, J319, J320, J322, J323, J324, J327, J328, J330, J331, J332, J333, J334, J335, J340, J341, E450, E451 |
| <b>Postvoid urine measurement</b>           | OHIP                 | Fee code G900                                                                                                                                                                                           |
| <b>TRUS biopsy</b>                          | OHIP                 | Fee code Z712                                                                                                                                                                                           |
| <b>Urodynamic study</b>                     | OHIP                 | Fee code G192, G193, G447                                                                                                                                                                               |
| <b>Urine culture</b>                        | OHIP                 | Fee code L633, L634, L641                                                                                                                                                                               |
| <b>Noninvasive uroflowmetry</b>             | OHIP                 | Fee code G475                                                                                                                                                                                           |

Data sources included CIHI-DAD (inpatient discharge abstracts) and OHIP (physician billings). CIHI-DAD used ICD-10 (for diagnostic coding) and CCI coding (for interventions) after April 1, 2002, and ICD-9/CCP coding prior to this. Specific ICD 9/10 and CCP/CCI codes are defined above. The presence of any data element within the year prior to the index date was considered evidence of the medical test or intervention.

**eTable 3.** Variables included in the propensity score.

---

**Demographics**

Year of cohort entry (based on 2 year increments)  
Region of residence (Using 1 of 14 Local Health Integration Networks (LHINs))  
Rural location

---

**Comorbid medical conditions**

Cancer  
Chronic lung disease  
Dementia  
Diabetes  
Hypertension  
Osteoporosis  
Prior fall  
Prostate Cancer

---

**Comorbidity Index**

John Hopkins ACG count

---

**Medication use**

ACE inhibitor or ARB  
Androgen deprivation therapy  
Antiandrogen therapy  
Antibiotic  
Benzodiazepine  
Bisphosphonates  
Denosumab  
Glucocorticoids  
Narcotics  
Overactive bladder medication  
Proton Pump Inhibitors  
Statin  
Total medication count

---

**Hospital and physician utilization**

Number of hospital admissions  
Number of emergency room visits  
Number of family physician visits  
Number of geriatric medicine visits  
Number of neurology visits  
Number of cardiology visits  
Number of urologist visits

---

**Medical investigations and procedures**

Echocardiography  
Bone mineral density test  
Bone scan  
Cardiac stress test  
Chest X-ray  
CT head  
Prostate specific antigen test  
Transrectal ultrasound guided prostate biopsy  
Urine culture  
Urodynamic test or post void residual measurement

---

Selected based on review of standardized differences between exposed and unexposed men prior to matching, and known association with falls or fractures.

**eTable 4. Coding definition for primary and secondary outcomes**

|                               | Data sources              | Codes                                                                                                                                                                                                                                                                                                                                                                                                                                                                                                                                                                                                                                                                                                                                                                                                                                                                                            |
|-------------------------------|---------------------------|--------------------------------------------------------------------------------------------------------------------------------------------------------------------------------------------------------------------------------------------------------------------------------------------------------------------------------------------------------------------------------------------------------------------------------------------------------------------------------------------------------------------------------------------------------------------------------------------------------------------------------------------------------------------------------------------------------------------------------------------------------------------------------------------------------------------------------------------------------------------------------------------------|
| Fall*                         | NACRS or CIHI-DAD         | ICD 10 W00-W19                                                                                                                                                                                                                                                                                                                                                                                                                                                                                                                                                                                                                                                                                                                                                                                                                                                                                   |
| Any Fracture**                | NACRS or CIHI-DAD or OHIP | <p><i>Hip</i> (ICD 10 S720, S721; CCI 1VA73, 1VC73, 1VA74, 1VA53, 1VC74, 1VA80)</p> <p><i>Forearm</i> (ICD 10 S52; CCI 1TV73, 1TV74, 1TV03; OHIP F014, F022, F023, F025, F026, F028, F030, F032, F033, F046, F024, F027, F031, Z203)</p> <p><i>Humerus</i> (ICD 10 S422, S423, S424)</p> <p><i>Vertebral</i> (S220, S221, S320, T080, T081)</p> <p><i>Femur</i> (ICD 10 S723; CCI 1VC73, 1VC74, 1VC03, 1VC80; OHIP F095, F096, F097, Z211)</p> <p><i>Pelvis</i> (ICD 10 S321, S322, S324, S323, S325, S327, S328)</p> <p><i>Ankle</i> (ICD 10 S825, S826, S827, S828, S829)</p> <p><i>Patella</i> (ICD 10 S820)</p> <p><i>Tibia/Fibula</i> (ICD 10 S821, S822, S823, S824)</p> <p><i>Ribs/sternum</i> (ICD 10 S222, S223, S224)</p> <p><i>Trunk</i> (ICD 10 S228, S29)</p> <p><i>Scapula</i> (ICD 10 S421, S29)</p> <p><i>Clavicle</i> (ICD 10 S420)</p> <p><i>Other</i> (ICD 10 M844, M843)</p> |
| Major Osteoporotic fracture** | NACRS or CIHI-DAD or OHIP | <p><i>Hip</i> (ICD 10 S720, S721; CCI 1VA73, 1VC73, 1VA74, 1VA53, 1VC74, 1VA80)</p> <p><i>Forearm</i> (ICD 10 S52; CCI 1TV73, 1TV74, 1TV03; OHIP F014, F022, F023, F025, F026, F028, F030, F032, F033, F046, F024, F027, F031, Z203)</p> <p><i>Humerus</i> (ICD 10 S422, S423, S424)</p> <p><i>Pelvis</i> (ICD 10 S321, S322, S324, S323, S325, S327, S328)</p>                                                                                                                                                                                                                                                                                                                                                                                                                                                                                                                                  |
| Hip fracture**                | NACRS or CIHI-DAD         | ICD 10 S720, S721; CCI 1VA73, 1VC73, 1VA74, 1VA53, 1VC74, 1VA80                                                                                                                                                                                                                                                                                                                                                                                                                                                                                                                                                                                                                                                                                                                                                                                                                                  |
| Hypotension***                | CIHI-DAD or NACRS         | ICD 10 I95                                                                                                                                                                                                                                                                                                                                                                                                                                                                                                                                                                                                                                                                                                                                                                                                                                                                                       |
| Head injury***                | CIHI-DAD or NACRS         | ICD 10 S00-S09                                                                                                                                                                                                                                                                                                                                                                                                                                                                                                                                                                                                                                                                                                                                                                                                                                                                                   |

CIHI DAD (hospital discharge abstracts) and NACRS (all emergency room visits) data is extracted from medical records by trained abstractors, and data quality is maintained through audit-feedback systems. Data on diagnoses are coded using ICD 10, and data for interventions are coded using Canadian Classification of Health Intervention (CCI). Up to 25 diagnoses and 25 interventions can be coded per patient. Data elements have shown >80% agreement with medical records during reabstraction studies<sup>1</sup>.

\*Using medical chart abstraction as the reference standard, PPV for ICD 10 codes for falls in NACRS is 91.4% (email communication, Dr Lisa-Ann Fraser, June 2015).

\*\*PPV for the coding combinations for fractures ranges between 0.81-0.96 depending on fracture site. Hip/femur fracture has an estimated PPV of 0.83<sup>2</sup>.

\*\*\*Using reabstracted information written in a patient's chart as the reference standard, the codes for hypotension (I95) and head injury (S06) have a sensitivity of 72% and 77% respectively, and a positive predictive value of 39% and 79% respectively<sup>3</sup>.

**eTable 5.** Complete baselines for unmatched and matched cohorts.

|                                                 |                     | Unmatched Cohort |       |            |                 | Matched Cohort |       |            |       |       |    |
|-------------------------------------------------|---------------------|------------------|-------|------------|-----------------|----------------|-------|------------|-------|-------|----|
|                                                 |                     | Unexposed        |       | Exposed    | SD <sup>*</sup> | Unexposed      |       | Exposed    |       | SD    |    |
|                                                 |                     | n=426,106        |       | n=186,004  |                 | n=147,084      |       | n=147,084  |       |       |    |
| <b>Demographics</b>                             |                     |                  |       |            |                 |                |       |            |       |       |    |
| <b>Age</b>                                      | <i>Median (IQR)</i> | 73 (69-79)       |       | 74 (69-80) |                 | 75 (70-80)     |       | 75 (70-80) |       |       |    |
|                                                 | <i>66-69.9</i>      | 118718           | 27.9% | 47798      | 25.7%           | 5%             | 35520 | 24.1%      | 35800 | 24.3% | 0% |
|                                                 | <i>70-74.9</i>      | 116482           | 27.3% | 46751      | 25.1%           | 5%             | 36549 | 24.8%      | 36306 | 24.7% | 0% |
|                                                 | <i>75-79.9</i>      | 89097            | 20.9% | 41518      | 22.3%           | 3%             | 33075 | 22.5%      | 33130 | 22.5% | 0% |
|                                                 | <i>80-84.9</i>      | 60538            | 14.2% | 29281      | 15.7%           | 4%             | 24412 | 16.6%      | 24329 | 16.5% | 0% |
|                                                 | <i>85-89.9</i>      | 29644            | 7.0%  | 15171      | 8.2%            | 5%             | 12843 | 8.7%       | 12824 | 8.7%  | 0% |
|                                                 | <i>≥90</i>          | 11627            | 2.7%  | 5485       | 2.9%            | 1%             | 4685  | 3.2%       | 4695  | 3.2%  | 0% |
| <b>Fiscal year of cohort entry (index date)</b> | <i>2003-2004</i>    | 35310            | 8.3%  | 18969      | 10.2%           | 7%             | 14002 | 9.5%       | 14598 | 9.9%  | 1% |
|                                                 | <i>2005-2006</i>    | 59789            | 14.0% | 30036      | 16.1%           | 6%             | 22316 | 15.2%      | 23616 | 16.1% | 2% |
|                                                 | <i>2007-2008</i>    | 72225            | 17.0% | 34202      | 18.4%           | 4%             | 25289 | 17.2%      | 27490 | 18.7% | 4% |
|                                                 | <i>2009-2010</i>    | 72156            | 16.9% | 31478      | 16.9%           | 0%             | 24377 | 16.6%      | 24927 | 16.9% | 1% |
|                                                 | <i>2011-2012</i>    | 125153           | 29.4% | 49057      | 26.4%           | 7%             | 41603 | 28.3%      | 38526 | 26.2% | 5% |
|                                                 | <i>2013</i>         | 61473            | 14.4% | 22262      | 12.0%           | 7%             | 19497 | 13.3%      | 17927 | 12.2% | 3% |
| <b>Rural Residence</b>                          |                     | 66897            | 15.7% | 23937      | 12.9%           | 8%             | 20064 | 13.6%      | 19968 | 13.6% | 0% |
| <b>Socioeconomic Status</b>                     | <i>1-Lowest</i>     | 76410            | 17.9% | 32566      | 17.5%           | 1%             | 26256 | 17.9%      | 25871 | 17.6% | 1% |
|                                                 | <i>2</i>            | 86180            | 20.2% | 37196      | 20.0%           | 0%             | 29685 | 20.2%      | 29543 | 20.1% | 0% |
|                                                 | <i>3</i>            | 84010            | 19.7% | 36322      | 19.5%           | 1%             | 28675 | 19.5%      | 28804 | 19.6% | 0% |
|                                                 | <i>4</i>            | 87012            | 20.4% | 38332      | 20.6%           | 0%             | 30106 | 20.5%      | 30205 | 20.5% | 0% |
|                                                 | <i>5-Highest</i>    | 91099            | 21.4% | 41056      | 22.1%           | 2%             | 31924 | 21.7%      | 32244 | 21.9% | 0% |
|                                                 | <i>Missing</i>      | 1395             | 0.3%  | 532        | 0.3%            | 0%             | 438   | 0.3%       | 417   | 0.3%  | 0% |
| <b>Resides in long term care</b>                |                     | 13565            | 3.2%  | 4799       | 2.6%            | 4%             | 4068  | 2.8%       | 4068  | 2.8%  | 0% |
| <b>Local Health Integration Network (LHIN)</b>  | <i>1</i>            | 23315            | 5.5%  | 11464      | 6.2%            | 3%             | 8940  | 6.1%       | 8941  | 6.1%  | 0% |
|                                                 | <i>2</i>            | 36753            | 8.6%  | 12419      | 6.7%            | 7%             | 10854 | 7.4%       | 10585 | 7.2%  | 1% |
|                                                 | <i>3</i>            | 22425            | 5.3%  | 7668       | 4.1%            | 6%             | 6474  | 4.4%       | 6390  | 4.3%  | 0% |
|                                                 | <i>4</i>            | 54938            | 12.9% | 21993      | 11.8%           | 3%             | 18107 | 12.3%      | 18226 | 12.4% | 0% |
|                                                 | <i>5</i>            | 19085            | 4.5%  | 9652       | 5.2%            | 3%             | 6992  | 4.8%       | 7282  | 5.0%  | 1% |
|                                                 | <i>6</i>            | 27924            | 6.6%  | 14313      | 7.7%            | 4%             | 11082 | 7.5%       | 10999 | 7.5%  | 0% |
|                                                 | <i>7</i>            | 30823            | 7.2%  | 16495      | 8.9%            | 6%             | 12191 | 8.3%       | 12286 | 8.4%  | 0% |
|                                                 | <i>8</i>            | 47803            | 11.2% | 24870      | 13.4%           | 7%             | 18494 | 12.6%      | 18417 | 12.5% | 0% |
|                                                 | <i>9</i>            | 52636            | 12.4% | 20688      | 11.1%           | 4%             | 16832 | 11.4%      | 16596 | 11.3% | 0% |
|                                                 | <i>10</i>           | 21035            | 4.9%  | 8542       | 4.6%            | 1%             | 6964  | 4.7%       | 6982  | 4.7%  | 0% |
|                                                 | <i>11</i>           | 39183            | 9.2%  | 17725      | 9.5%            | 1%             | 13964 | 9.5%       | 14016 | 9.5%  | 0% |
|                                                 | <i>12</i>           | 17218            | 4.0%  | 7696       | 4.1%            | 1%             | 6053  | 4.1%       | 6179  | 4.2%  | 1% |
|                                                 | <i>13</i>           | 23854            | 5.6%  | 9878       | 5.3%            | 1%             | 8000  | 5.4%       | 8035  | 5.5%  | 0% |
|                                                 | <i>14</i>           | 9114             | 2.1%  | 2601       | 1.4%            | 5%             | 2137  | 1.5%       | 2150  | 1.5%  | 0% |
| <b>Comorbid medical conditions</b>              |                     |                  |       |            |                 |                |       |            |       |       |    |
| <b>Acute Kidney injury</b>                      |                     | 8913             | 2.1%  | 5611       | 3.0%            | 6%             | 4351  | 3.0%       | 4393  | 3.0%  | 0% |
| <b>Alcoholism</b>                               |                     | 4661             | 1.1%  | 2022       | 1.1%            | 0%             | 1702  | 1.2%       | 1616  | 1.1%  | 1% |

|                                                                 |                     |          |       |          |       |     |        |       |          |       |    |
|-----------------------------------------------------------------|---------------------|----------|-------|----------|-------|-----|--------|-------|----------|-------|----|
| <b>Atrial fibrillation/flutter</b>                              |                     | 27665    | 6.5%  | 13945    | 7.5%  | 4%  | 12034  | 8.2%  | 11391    | 7.7%  | 2% |
| <b>Cancer</b>                                                   |                     | 69442    | 16.3% | 38230    | 20.6% | 11% | 32379  | 22.0% | 30194    | 20.5% | 4% |
| <b>Cataract</b>                                                 |                     | 74269    | 17.4% | 34179    | 18.4% | 3%  | 28455  | 19.3% | 27981    | 19.0% | 1% |
| <b>Chronic kidney disease</b>                                   |                     | 32710    | 7.7%  | 16670    | 9.0%  | 5%  | 14429  | 9.8%  | 13425    | 9.1%  | 2% |
| <b>Chronic liver disease</b>                                    |                     | 14329    | 3.4%  | 7092     | 3.8%  | 2%  | 5853   | 4.0%  | 5516     | 3.8%  | 1% |
| <b>Chronic lung disease</b>                                     |                     | 103516   | 24.3% | 51517    | 27.7% | 8%  | 41298  | 28.1% | 41344    | 28.1% | 0% |
| <b>Congestive heart failure</b>                                 |                     | 49675    | 11.7% | 23908    | 12.9% | 4%  | 20714  | 14.1% | 19577    | 13.3% | 2% |
| <b>Coronary artery disease or angina</b>                        |                     | 166116   | 39.0% | 76510    | 41.1% | 4%  | 63040  | 42.9% | 62404    | 42.4% | 1% |
| <b>Dementia</b>                                                 |                     | 38377    | 9.0%  | 18690    | 10.0% | 3%  | 14590  | 9.9%  | 15461    | 10.5% | 2% |
| <b>Diabetes mellitus</b>                                        |                     | 92023    | 21.6% | 36461    | 19.6% | 5%  | 30307  | 20.6% | 30784    | 20.9% | 1% |
| <b>Number of previous falls</b>                                 | 0                   | 422786   | 99.2% | 183224   | 98.5% | 7%  | 145058 | 98.6% | 145036   | 98.6% | 0% |
|                                                                 | 1                   | 2986     | 0.7%  | 2460     | 1.3%  | 6%  | 1794   | 1.2%  | 1817     | 1.2%  | 0% |
|                                                                 | 2                   | 274      | 0.1%  | 268      | 0.1%  | 0%  | 187    | 0.1%  | 188      | 0.1%  | 0% |
|                                                                 | ≥3                  | 60       | 0.0%  | 52       | 0.0%  | 0%  | 45     | 0.0%  | 43       | 0.0%  | 0% |
| <b>Prior Fracture</b>                                           |                     | 2256     | 0.5%  | 1838     | 1.0%  | 6%  | 1294   | 0.9%  | 1294     | 0.9%  | 0% |
| <b>Glaucoma</b>                                                 |                     | 27244    | 6.4%  | 11507    | 6.2%  | 1%  | 9956   | 6.8%  | 9556     | 6.5%  | 1% |
| <b>Hypertension</b>                                             |                     | 304887   | 71.6% | 120457   | 64.8% | 15% | 102623 | 69.8% | 102036   | 69.4% | 1% |
| <b>Hypotension</b>                                              |                     | 6068     | 1.4%  | 3310     | 1.8%  | 3%  | 2796   | 1.9%  | 2615     | 1.8%  | 1% |
| <b>Macular degeneration</b>                                     |                     | 12028    | 2.8%  | 5097     | 2.7%  | 1%  | 4428   | 3.0%  | 4144     | 2.8%  | 1% |
| <b>Obesity (BMI &gt;40)</b>                                     |                     | 18567    | 4.4%  | 8740     | 4.7%  | 1%  | 6854   | 4.7%  | 6835     | 4.6%  | 0% |
| <b>Osteoporosis</b>                                             |                     | 21179    | 5.0%  | 11257    | 6.1%  | 5%  | 9010   | 6.1%  | 8795     | 6.0%  | 0% |
| <b>Parkinson's disease</b>                                      |                     | 2251     | 0.5%  | 1477     | 0.8%  | 4%  | 1113   | 0.8%  | 1169     | 0.8%  | 0% |
| <b>Peripheral vascular disease</b>                              |                     | 9107     | 2.1%  | 4017     | 2.2%  | 1%  | 3691   | 2.5%  | 3331     | 2.3%  | 1% |
| <b>Prostate cancer</b>                                          |                     | 39758    | 9.3%  | 21332    | 11.5% | 7%  | 19112  | 13.0% | 17173    | 11.7% | 4% |
| <b>Rheumatoid arthritis</b>                                     |                     | 15407    | 3.6%  | 7734     | 4.2%  | 3%  | 6248   | 4.2%  | 6216     | 4.2%  | 0% |
| <b>Seizure</b>                                                  |                     | 2599     | 0.6%  | 1306     | 0.7%  | 1%  | 1090   | 0.7%  | 1040     | 0.7%  | 0% |
| <b>Stroke or TIA</b>                                            |                     | 12592    | 3.0%  | 6687     | 3.6%  | 3%  | 5195   | 3.5%  | 5368     | 3.6%  | 1% |
| <b>Comorbidity Index (based on 3 year lookback window)</b>      |                     |          |       |          |       |     |        |       |          |       |    |
| <b>Charlson comorbidity index</b>                               | <i>Median (IQR)</i> | 0        | (0-2) | 0        | (0-2) |     | 0      | (0-2) | 0        | (0-2) |    |
|                                                                 | 0                   | 325765   | 76.5% | 134274   | 72.2% | 10% | 102838 | 69.9% | 105567   | 71.8% | 4% |
|                                                                 | 1                   | 38987    | 9.1%  | 18379    | 9.9%  | 3%  | 15051  | 10.2% | 14841    | 10.1% | 0% |
|                                                                 | 2                   | 31279    | 7.3%  | 16564    | 8.9%  | 6%  | 14598  | 9.9%  | 13138    | 8.9%  | 3% |
|                                                                 | ≥3                  | 30075    | 7.1%  | 16787    | 9.0%  | 7%  | 14597  | 9.9%  | 13538    | 9.2%  | 2% |
| <b>Number of Johns Hopkins ACG Aggregated Diagnosis Groups</b>  | <i>Median (IQR)</i> | 7 (5-10) |       | 9 (6-11) |       |     |        |       | 8 (6-11) |       |    |
|                                                                 | 0-4                 | 103199   | 24.2% | 25020    | 13.5% | 28% | 19630  | 13.3% | 19152    | 13.0% | 1% |
|                                                                 | 5-9                 | 97005    | 22.8% | 61420    | 33.0% | 7%  | 68262  | 46.4% | 70116.00 | 47.7% | 2% |
|                                                                 | 10-14               | 14866    | 3.5%  | 13165.00 | 7.1%  | 23% | 48762  | 33.2% | 47961.00 | 32.6% | 1% |
|                                                                 | 15-19               | 424      | 0.1%  | 565      | 0.3%  | 16% | 10085  | 6.9%  | 9482     | 6.4%  | 2% |
|                                                                 | ≥20                 | 210612   | 49.4% | 85834    | 46.1% | 4%  | 345    | 0.2%  | 373      | 0.3%  | 2% |
| <b>Medication use (in the 180 days prior to the index date)</b> |                     |          |       |          |       |     |        |       |          |       |    |
| <b>5 alpha reductase inhibitor</b>                              |                     | 10838    | 2.5%  | 20474    | 11.0% | 34% | 10826  | 7.4%  | 10826    | 7.4%  | 0% |
| <b>ACE inhibitors or ARBs</b>                                   |                     | 218787   | 51.3% | 85697    | 46.1% | 10% | 72764  | 49.5% | 72529    | 49.3% | 0% |
| <b>Androgen deprivation therapy</b>                             |                     | 6728     | 1.6%  | 5120     | 2.8%  | 8%  | 4051   | 2.8%  | 3974     | 2.7%  | 1% |

|                                         |                     |         |          |          |     |          |          |       |          |       |    |
|-----------------------------------------|---------------------|---------|----------|----------|-----|----------|----------|-------|----------|-------|----|
| Anti-inflammatory                       | 61927               | 14.5%   | 29786    | 16.0%    | 4%  | 23196    | 15.8%    | 24681 | 16.8%    | 3%    |    |
| Antiandrogens                           | 4479                | 1.1%    | 3676     | 2.0%     | 7%  | 2736     | 1.9%     | 2743  | 1.9%     | 0%    |    |
| Antibiotic                              | 118029              | 27.7%   | 71863    | 38.6%    | 23% | 54917    | 37.3%    | 56281 | 38.3%    | 2%    |    |
| Anticoagulant                           | 5411                | 1.3%    | 2526     | 1.4%     | 1%  | 2372     | 1.6%     | 2047  | 1.4%     | 2%    |    |
| Anticonvulsants                         | 18254               | 4.3%    | 9170     | 4.9%     | 3%  | 7411     | 5.0%     | 7429  | 5.1%     | 0%    |    |
| Antidepressants                         | 25650               | 6.0%    | 13242    | 7.1%     | 4%  | 10568    | 7.2%     | 10846 | 7.4%     | 1%    |    |
| Antineoplastic                          | 15852               | 3.7%    | 9293     | 5.0%     | 6%  | 8139     | 5.5%     | 7419  | 5.0%     | 2%    |    |
| Antiparkinson drug                      | 8326                | 2.0%    | 4813     | 2.6%     | 4%  | 3552     | 2.4%     | 3970  | 2.7%     | 2%    |    |
| Antiplatelet                            | 27649               | 6.5%    | 12724    | 6.8%     | 1%  | 10700    | 7.3%     | 10561 | 7.2%     | 0%    |    |
| Antipsychotic (atypical)                | 12243               | 2.9%    | 4917     | 2.6%     | 2%  | 4572     | 3.1%     | 4153  | 2.8%     | 2%    |    |
| Antipsychotic (other)                   | 3644                | 0.9%    | 1854     | 1.0%     | 1%  | 1663     | 1.1%     | 1497  | 1.0%     | 1%    |    |
| Benzodiazepine                          | 49030               | 11.5%   | 25979    | 14.0%    | 8%  | 20868    | 14.2%    | 21220 | 14.4%    | 1%    |    |
| Beta blockers                           | 135582              | 31.8%   | 53959    | 29.0%    | 6%  | 47435    | 32.3%    | 45448 | 30.9%    | 3%    |    |
| Bisphosphonate                          | 22573               | 5.3%    | 12004    | 6.5%     | 5%  | 10024    | 6.8%     | 9590  | 6.5%     | 1%    |    |
| Calcium channel blockers                | 111886              | 26.3%   | 47549    | 25.6%    | 2%  | 39507    | 26.9%    | 40141 | 27.3%    | 1%    |    |
| Cholinesterase inhibitors               | 13344               | 3.1%    | 5727     | 3.1%     | 0%  | 5169     | 3.5%     | 4893  | 3.3%     | 1%    |    |
| Denosumab                               | 93                  | 0.0%    | 41       | 0.0%     | 5%  | 41       | 0.0%     | 34    | 0.0%     | 1%    |    |
| Digoxin                                 | 14499               | 3.4%    | 6405     | 3.4%     | 0%  | 6062     | 4.1%     | 5378  | 3.7%     | 2%    |    |
| Glucocorticoids                         | 32037               | 7.5%    | 17262    | 9.3%     | 6%  | 14149    | 9.6%     | 14000 | 9.5%     | 0%    |    |
| Glucose test strip                      | 4736                | 1.1%    | 1939     | 1.0%     | 0%  | 1626     | 1.1%     | 1604  | 1.1%     | 0%    |    |
| Inhaled acetylcholine                   | 26936               | 6.3%    | 13319    | 7.2%     | 4%  | 10994    | 7.5%     | 11138 | 7.6%     | 0%    |    |
| Inhaled beta-agonist                    | 47862               | 11.2%   | 22750    | 12.2%    | 3%  | 19544    | 13.3%    | 18805 | 12.8%    | 1%    |    |
| Inhaled corticosteroid                  | 21522               | 5.1%    | 10007    | 5.4%     | 1%  | 8764     | 6.0%     | 8145  | 5.5%     | 2%    |    |
| Narcotics                               | 63767               | 15.0%   | 35285    | 19.0%    | 11% | 28254    | 19.2%    | 28523 | 19.4%    | 1%    |    |
| Non-potassium sparing diuretics         | 107470              | 25.2%   | 41600    | 22.4%    | 7%  | 38851    | 26.4%    | 35062 | 23.8%    | 6%    |    |
| Overactive bladder medication           | 5342                | 1.3%    | 6439     | 3.5%     | 14% | 4057     | 2.8%     | 4411  | 3.0%     | 1%    |    |
| Potassium sparing diuretics             | 16418               | 3.9%    | 6306     | 3.4%     | 3%  | 6224     | 4.2%     | 5321  | 3.6%     | 3%    |    |
| Proton Pump inhibitors                  | 91823               | 21.5%   | 45558    | 24.5%    | 7%  | 38025    | 25.9%    | 37415 | 25.4%    | 1%    |    |
| Selective Serotonin Reuptake Inhibitors | 25783               | 6.1%    | 12471    | 6.7%     | 2%  | 10368    | 7.0%     | 10315 | 7.0%     | 0%    |    |
| Smoking cessation aid                   | 501                 | 0.1%    | 200      | 0.1%     | 0%  | 151      | 0.1%     | 158   | 0.1%     | 0%    |    |
| Statins                                 | 211307              | 49.6%   | 85185    | 45.8%    | 8%  | 71769    | 48.8%    | 71449 | 48.6%    | 0%    |    |
| Testosterone replacement                | 2401                | 0.6%    | 1326     | 0.7%     | 1%  | 996      | 0.7%     | 1064  | 0.7%     | 0%    |    |
| Number of unique medications            | <i>Median (IQR)</i> | 6 (3-9) | 6 (3-10) |          |     | 7 (4-10) | 7 (4-10) |       |          |       |    |
|                                         | 0                   | 0       | 0.0%     | 10793    | 35% | 35%      | 0        | 0.0%  | 0        | 0.0%  | 0% |
|                                         | 1-4                 | 163603  | 38.4%    | 53418    | 21% | 21%      | 45795    | 31.1% | 47086    | 32.0% | 2% |
|                                         | 5-8                 | 147738  | 34.7%    | 58162.00 | 7%  | 7%       | 50084    | 34.1% | 49144.00 | 33.4% | 1% |
|                                         | 9-12                | 71489   | 16.8%    | 35343.00 | 6%  | 6%       | 29317    | 19.9% | 28799.00 | 19.6% | 1% |
|                                         | 13-16               | 27772   | 6.5%     | 16619    | 9%  | 9%       | 13350    | 9.1%  | 13150    | 8.9%  | 1% |
|                                         | ≥17                 | 15504   | 3.6%     | 11669    | 12% | 12%      | 8538     | 5.8%  | 8905     | 6.1%  | 1% |

#### Hospital and Physician Utilisation

|                               |                     |         |         |        |       |     |       |         |       |       |    |
|-------------------------------|---------------------|---------|---------|--------|-------|-----|-------|---------|-------|-------|----|
| Number of hospital admissions | <i>Median (IQR)</i> | 0 (0-1) | 0 (0-1) |        |       |     |       | 0 (0-1) |       |       |    |
|                               | 0                   | 304363  | 71.4%   | 109456 | 58.8% | 27% | 89192 | 60.6%   | 88795 | 60.4% | 0% |
|                               | 1                   | 74362   | 17.5%   | 43584  | 23.4% | 15% | 32978 | 22.4%   | 33218 | 22.6% | 0% |

|                                              |                     |          |       |          |       |     |          |       |        |       |    |
|----------------------------------------------|---------------------|----------|-------|----------|-------|-----|----------|-------|--------|-------|----|
|                                              | 2                   | 28981    | 6.8%  | 18345    | 9.9%  | 11% | 14010    | 9.5%  | 14120  | 9.6%  | 0% |
|                                              | ≥3                  | 18400    | 4.3%  | 14619    | 7.9%  | 15% | 10904    | 7.4%  | 10951  | 7.4%  | 0% |
| <b>Number of Emergency Room visits</b>       | <i>Median (IQR)</i> | 0 (0-1)  |       | 0 (0-1)  |       |     | 0 (0-1)  |       |        |       |    |
|                                              | 0                   | 306292   | 71.9% | 115537   | 62.1% | 21% | 92414    | 62.8% | 91941  | 62.5% | 1% |
|                                              | 1                   | 70553    | 16.6% | 36929    | 19.9% | 9%  | 29150    | 19.8% | 29305  | 19.9% | 0% |
|                                              | 2                   | 25618    | 6.0%  | 16289    | 8.8%  | 11% | 12612    | 8.6%  | 12679  | 8.6%  | 0% |
|                                              | ≥3                  | 23643    | 5.5%  | 17249    | 9.3%  | 15% | 12908    | 8.8%  | 13159  | 8.9%  | 0% |
| <b>Number of family physician visits</b>     | <i>Median (IQR)</i> | 6 (3-11) |       | 7 (4-13) |       |     | 7 (4-13) |       |        |       |    |
|                                              | 0                   | 17514    | 4.1%  | 5791     | 3.1%  | 5%  | 3918     | 2.7%  | 3967   | 2.7%  | 0% |
|                                              | 1-2                 | 54261    | 12.7% | 17635    | 9.5%  | 10% | 12899    | 8.8%  | 12995  | 8.8%  | 0% |
|                                              | 3-4                 | 79480    | 18.7% | 27662    | 14.9% | 10% | 22140    | 15.1% | 21980  | 14.9% | 1% |
|                                              | 5-6                 | 75196    | 17.6% | 30102    | 16.2% | 4%  | 24651    | 16.8% | 24344  | 16.6% | 1% |
|                                              | 7-8                 | 54448    | 12.8% | 24611    | 13.2% | 1%  | 20198    | 13.7% | 19881  | 13.5% | 1% |
|                                              | 9-10                | 36712    | 8.6%  | 18061    | 9.7%  | 4%  | 14772    | 10.0% | 14506  | 9.9%  | 0% |
|                                              | ≥11                 | 108495   | 25.5% | 62142    | 33.4% | 17% | 48506    | 33.0% | 49411  | 33.6% | 1% |
| <b>Number of Geriatrician visits</b>         | <i>Median (IQR)</i> | 0 (0-0)  |       | 0 (0-0)  |       |     | 0 (0-0)  |       |        |       |    |
|                                              | 0                   | 415069   | 97.4% | 177844   | 95.6% | 10% | 141198   | 96.0% | 140922 | 95.8% | 1% |
|                                              | 1                   | 5097     | 1.2%  | 3352     | 1.8%  | 5%  | 2503     | 1.7%  | 2594   | 1.8%  | 1% |
|                                              | 2                   | 2418     | 0.6%  | 1671     | 0.9%  | 3%  | 1234     | 0.8%  | 1257   | 0.9%  | 1% |
|                                              | ≥3                  | 3522     | 0.8%  | 3137     | 1.7%  | 8%  | 2149     | 1.5%  | 2311   | 1.6%  | 1% |
| <b>Number of Neurologist visits</b>          | <i>Median (IQR)</i> | 0 (0-0)  |       | 0 (0-0)  |       |     | 0 (0-0)  |       |        |       |    |
|                                              | 0                   | 401060   | 94.1% | 169928   | 91.4% | 10% | 135241   | 91.9% | 134846 | 91.7% | 1% |
|                                              | 1                   | 13397    | 3.1%  | 7847     | 4.2%  | 6%  | 5974     | 4.1%  | 6104   | 4.2%  | 1% |
|                                              | 2                   | 6448     | 1.5%  | 4112     | 2.2%  | 5%  | 3053     | 2.1%  | 3127   | 2.1%  | 0% |
|                                              | ≥3                  | 5201     | 1.2%  | 4117     | 2.2%  | 8%  | 2816     | 1.9%  | 3007   | 2.0%  | 1% |
| <b>Number of Cardiologist visits</b>         | <i>Median (IQR)</i> | 0 (0-1)  |       | 0 (0-1)  |       |     | 0 (0-2)  |       |        |       |    |
|                                              | 0                   | 265403   | 62.3% | 103906   | 55.9% | 13% | 81840    | 55.6% | 82042  | 55.8% | 0% |
|                                              | 1                   | 74142    | 17.4% | 35826    | 19.3% | 5%  | 28238    | 19.2% | 28237  | 19.2% | 0% |
|                                              | 2                   | 33092    | 7.8%  | 16785    | 9.0%  | 4%  | 13555    | 9.2%  | 13379  | 9.1%  | 0% |
|                                              | ≥3                  | 53469    | 12.5% | 29487    | 15.9% | 10% | 23451    | 15.9% | 23426  | 15.9% | 0% |
| <b>Number of Urologist visits</b>            | <i>Median (IQR)</i> | 0 (0-0)  |       | 0 (0-2)  |       |     | 0 (0-1)  |       |        |       |    |
|                                              | 0                   | 357268   | 83.8% | 100518   | 54.0% | 68% | 89489    | 60.8% | 90134  | 61.3% | 1% |
|                                              | 1                   | 27955    | 6.6%  | 32619    | 17.5% | 34% | 23241    | 15.8% | 22430  | 15.2% | 2% |
|                                              | 2                   | 17502    | 4.1%  | 21662    | 11.6% | 28% | 14517    | 9.9%  | 14257  | 9.7%  | 1% |
|                                              | ≥3                  | 23381    | 5.5%  | 31205    | 16.8% | 36% | 19837    | 13.5% | 20263  | 13.8% | 1% |
| <b>Number of Ophthalmologist visits</b>      | <i>Median (IQR)</i> | 2 (1-4)  |       | 2 (1-4)  |       |     | 2 (1-4)  |       |        |       |    |
|                                              | 0                   | 306825   | 72.0% | 129425   | 69.6% | 5%  | 100668   | 68.4% | 101731 | 69.2% | 2% |
|                                              | 1                   | 47864    | 11.2% | 23761    | 12.8% | 5%  | 18585    | 12.6% | 18854  | 12.8% | 1% |
|                                              | 2                   | 25373    | 6.0%  | 12011    | 6.5%  | 2%  | 9928     | 6.7%  | 9573   | 6.5%  | 1% |
|                                              | ≥3                  | 46044    | 10.8% | 20807    | 11.2% | 1%  | 17903    | 12.2% | 16926  | 11.5% | 2% |
| <b>Medical investigations and procedures</b> |                     |          |       |          |       |     |          |       |        |       |    |
| <b>Bone mineral density test</b>             |                     | 15490    | 3.6%  | 8704     | 4.7%  | 6%  | 6842     | 4.7%  | 6636   | 4.5%  | 1% |
| <b>Bone scan</b>                             |                     | 9798     | 2.3%  | 9465     | 5.1%  | 15% | 6446     | 4.4%  | 6668   | 4.5%  | 0% |

|                                       |        |       |       |       |     |       |       |       |       |    |
|---------------------------------------|--------|-------|-------|-------|-----|-------|-------|-------|-------|----|
| <b>Cardiac catheterization</b>        | 8512   | 2.0%  | 4377  | 2.4%  | 3%  | 3373  | 2.3%  | 3565  | 2.4%  | 1% |
| <b>Cardiac stress test</b>            | 51037  | 12.0% | 26955 | 14.5% | 7%  | 21126 | 14.4% | 21066 | 14.3% | 0% |
| <b>Carotid endarterectomy</b>         | 402    | 0.1%  | 241   | 0.1%  | 0%  | 176   | 0.1%  | 191   | 0.1%  | 0% |
| <b>Carotid ultrasound</b>             | 20098  | 4.7%  | 10647 | 5.7%  | 5%  | 8495  | 5.8%  | 8466  | 5.8%  | 0% |
| <b>Chest x-ray</b>                    | 128826 | 30.2% | 71018 | 38.2% | 17% | 55893 | 38.0% | 55992 | 38.1% | 0% |
| <b>CT head</b>                        | 29622  | 7.0%  | 18993 | 10.2% | 11% | 14361 | 9.8%  | 14752 | 10.0% | 1% |
| <b>CT spine</b>                       | 5304   | 1.2%  | 3833  | 2.1%  | 7%  | 2638  | 1.8%  | 2930  | 2.0%  | 1% |
| <b>Echocardiography</b>               | 73390  | 17.2% | 37689 | 20.3% | 8%  | 30330 | 20.6% | 29944 | 20.4% | 0% |
| <b>EEG</b>                            | 2075   | 0.5%  | 1322  | 0.7%  | 3%  | 1042  | 0.7%  | 980   | 0.7%  | 0% |
| <b>Heart valve replacement</b>        | 622    | 0.1%  | 408   | 0.2%  | 3%  | 253   | 0.2%  | 329   | 0.2%  | 0% |
| <b>Holter monitoring</b>              | 24508  | 5.8%  | 13320 | 7.2%  | 6%  | 10305 | 7.0%  | 10578 | 7.2%  | 1% |
| <b>Prostate-specific antigen test</b> | 39022  | 9.2%  | 28331 | 15.2% | 18% | 22420 | 15.2% | 20168 | 13.7% | 4% |
| <b>Pulmonary function test</b>        | 35519  | 8.3%  | 18704 | 10.1% | 6%  | 15006 | 10.2% | 14784 | 10.1% | 0% |
| <b>Postvoid urine measurement</b>     | 4606   | 1.1%  | 8964  | 4.8%  | 22% | 4490  | 3.1%  | 4689  | 3.2%  | 1% |
| <b>TRUS biopsy</b>                    | 4116   | 1.0%  | 8570  | 4.6%  | 22% | 4026  | 2.7%  | 4710  | 3.2%  | 3% |
| <b>Urodynamic study</b>               | 462    | 0.1%  | 1087  | 0.6%  | 8%  | 451   | 0.3%  | 569   | 0.4%  | 2% |
| <b>Urine culture</b>                  | 56320  | 13.2% | 58941 | 31.7% | 45% | 39070 | 26.6% | 40731 | 27.7% | 2% |
| <b>Noninvasive uroflowmetry</b>       | 9192   | 2.2%  | 19372 | 10.4% | 34% | 8960  | 6.1%  | 9968  | 6.8%  | 3% |

\*Standardized differences (SD) describe differences in between group means relative to a pooled standard deviation, and better demonstrate significant differences in large samples. A SD > 10% is considered a meaningful difference between groups.



**eTable 6.** Study alpha antagonists and their doses and prescription details for the 147,084 exposed men.

|                                                                                                          | <b>Tamsulosin</b>                             | <b>Silodosin</b>  | <b>Alfuzosin</b>                 |
|----------------------------------------------------------------------------------------------------------|-----------------------------------------------|-------------------|----------------------------------|
| Number (%)                                                                                               | 123537 (84.0%)                                | 2720 (1.8%)       | 20827 (14.2%)                    |
| Median Dose (IQR)                                                                                        | 0.4mg (0.4-0.4)                               | 8mg (8-8)         | 10mg (10-10)                     |
|                                                                                                          | 0.4mg: 114509 (92.7%)                         | 4mg: 354 (13.0%)  | 10mg: 20418 (98.0%)              |
|                                                                                                          | 0.8mg: 6802 (5.5%)                            | 8mg: 2324 (85.4%) | 20mg: 135 (0.6%)                 |
|                                                                                                          | Other: 2226 (1.8%)                            | Other: 42 (1.5%)  | Other: 274 (1.3%)                |
| Labelled dose                                                                                            | 0.4mg                                         | 4mg or 8mg        | 10mg                             |
| Included formulations                                                                                    | Tamsulosin (generic), Flomax™, and Flomax CR™ | Rapaflo™          | Alfuzosin (generic), and Xatral™ |
| Median Prescription length, days (IQR)                                                                   | 30 (30-60)                                    | 30 (30-30)        | 30 (30-30)                       |
| Number (%) of men that refill a prescription within 7 days of predicted end-date of initial prescription | 59558 (48.2%)                                 | 1465 (53.9%)      | 10174 (48.9%)                    |

**eTable 7.** Primary outcomes among exposed and unexposed patients in the 180 days prior to alpha antagonist initiation or index date.

|                        | Events n (%)                                                              |                                                                                 | Odds Ratio (95% CI) | Change in Percent Absolute Risk (95% CI) |
|------------------------|---------------------------------------------------------------------------|---------------------------------------------------------------------------------|---------------------|------------------------------------------|
|                        | <i>Future alpha antagonist users (Exposed cohort)</i><br><i>n=119,831</i> | <i>Future non-alpha antagonist users (Unexposed cohort)</i><br><i>n=119,831</i> |                     |                                          |
| <b>Primary outcome</b> |                                                                           |                                                                                 |                     |                                          |
| Fall                   | 1469 (1.23%)                                                              | 1595 (1.33%)                                                                    | 0.92 (0.86-0.99)    | -0.11 (-0.20 to -0.02)                   |
| Fracture               | 495 (0.41%)                                                               | 577 (0.48%)                                                                     | 0.86 (0.76-0.97)    | -0.07 (-0.12 to -0.01)                   |

Exclusion criteria were reapplied to the study cohort based on a new index date 180 days prior to primary study index date (initiation of alpha antagonist). All eligible matched pairs who were not excluded were retained. The primary outcomes of 90-day risk of fall and fracture were then determined to assess for a potential baseline increased risk of fall and fracture due to lower urinary tract symptoms among men who go on to initiate alpha antagonist therapy in the future.

**eFigure 1.** Flow diagram of cohort selection.

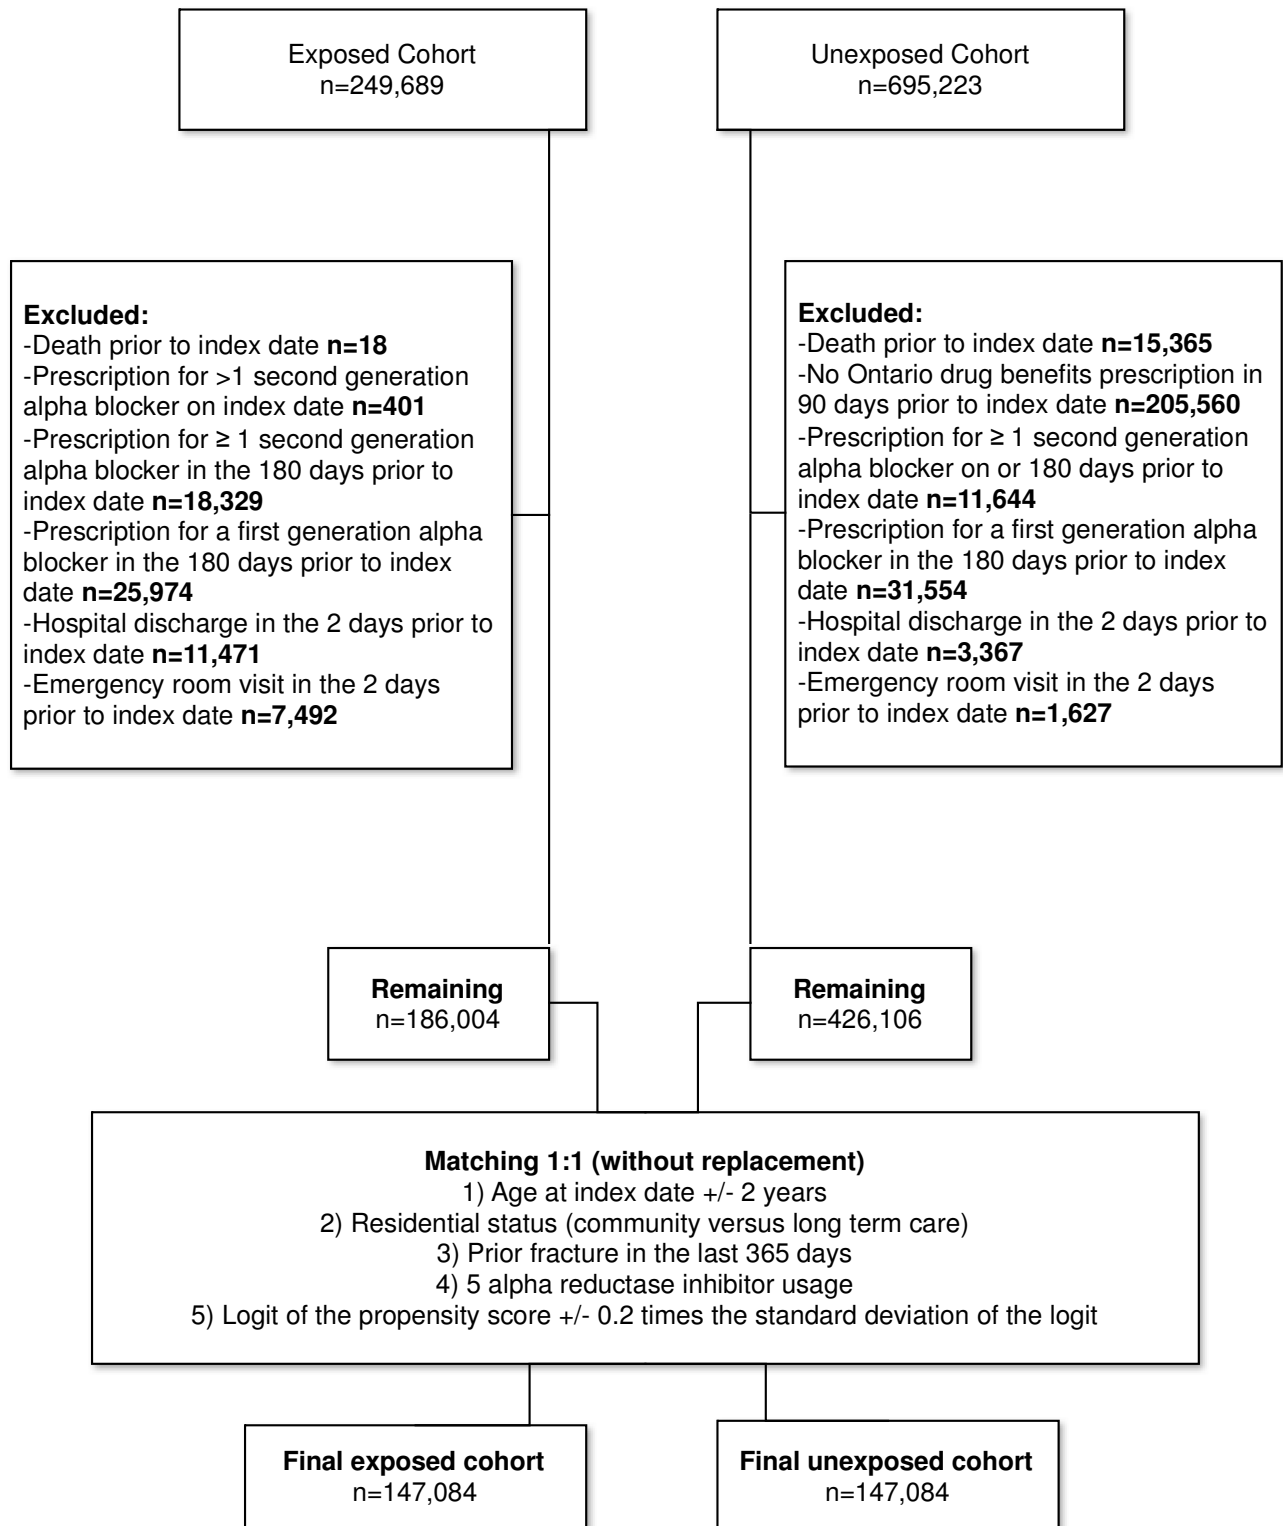

## References

1. Roos LL, Gupta S, Soodeen R-A, Jebamani L. Data quality in an information-rich environment: Canada as an example. *Can J Aging*. 2005;24 Suppl 1:153–170.
2. Jean S, Candas B, Belzile É, et al. Algorithms can be used to identify fragility fracture cases in physician-claims databases. *Osteoporos Int*. 2012;23(2):483–501.
3. Juurlink D, Preyra C, Croxford R, Chong A, Austin P, Tu J, et al. Canadian Institute for Health Information Discharge Abstract Database: a validation study. Toronto, Ontario, Canada: Institute for Clinical Evaluative Sciences; 2006. Accessed at [www.ices.on.ca/flip-publication/canadian-istitute-for-health-information-discharge/index.html#41/z](http://www.ices.on.ca/flip-publication/canadian-istitute-for-health-information-discharge/index.html#41/z) on April 20, 2015.)
